# Supplementary material
Source: publisher site journal article supplement (https://www.dovepress.com/article/418803)
Supplement: Supplementary file 1 [file get_supplementary_file.php]

**Appendix A.** Medline Search Strategy

| **#** | **Searches** | **Results** |
| --- | --- | --- |
| 1 | Cardiology Service, Hospital/ | 1774 |
| 2 | exp Cardiovascular Surgical Procedures/ | 396300 |
| 3 | Aortic Aneurysm/ | 21572 |
| 4 | Peripheral Vascular Diseases/ | 12643 |
| 5 | Peripheral Arterial Disease/ | 8079 |
| 6 | Venous Thrombosis/ | 25965 |
| 7 | exp Ischemia/ | 271968 |
| 8 | Myocardial Infarction/ | 166577 |
| 9 | exp Pericarditis/ | 11771 |
| 10 | exp Heart Arrest/ | 48678 |
| 11 | exp Cardiomyopathies/ | 95022 |
| 12 | exp Heart Failure/ | 123284 |
| 13 | exp Coronary Artery Bypass/ | 53131 |
| 14 | Transcatheter Aortic Valve Replacement/ | 6067 |
| 15 | aortic aneurysm.mp. | 57490 |
| 16 | ((cardiac or vascular or cardiovascular or arter*) adj3 (surger* or disease* or disorder*)).mp. | 641187 |
| 17 | cardiovascular disease*.mp. | 268045 |
| 18 | peripheral vascular disease*.mp. | 20719 |
| 19 | deep vein thrombos*.mp. | 17771 |
| 20 | peripheral artery disease*.mp. | 5877 |
| 21 | CABG.mp. | 18549 |
| 22 | pericarditis.mp. | 15613 |
| 23 | (myocard* adj3 (isch?emi* or infarct*)).mp. | 304296 |
| 24 | ((cardiac or heart) adj3 failure*).mp. | 221207 |
| 25 | cardiac arrest*.mp. | 36616 |
| 26 | cardiomyopath*.mp. | 99030 |
| 27 | (coronary adj3 bypass*).mp. | 69446 |
| 28 | aortic valve replacement*.mp. | 21382 |
| 29 | mitral valve replacement*.mp. | 7561 |
| 30 | pulmonary valve replacement*.mp. | 974 |
| 31 | tricuspid valve replacement*.mp. | 1003 |
| 32 | aortic dissect*.mp. | 14215 |
| 33 | femoral bypass*.mp. | 863 |
| 34 | angina.mp. | 70475 |
| 35 | angioplast*.mp. | 77610 |
| 36 | stent*.mp. | 118888 |
| 37 | or/1-36 | 1621862 |
| 38 | exp Rehabilitation/ | 308543 |
| 39 | Rehabilitation Centers/ | 8234 |
| 40 | Episode of Care/ | 1784 |
| 41 | Rehabilitation Research/ | 188 |
| 42 | Rehabilitation Nursing/ | 1416 |
| 43 | exp "Physical and Rehabilitation Medicine"/ | 40051 |
| 44 | Convalescence/ | 3621 |
| 45 | Social Work/ | 15368 |
| 46 | exp Allied Health Occupations/ | 50669 |
| 47 | physiotherap*.mp. | 27171 |
| 48 | (episod* adj5 care*).mp. | 5489 |
| 49 | rehab*.mp. | 329997 |
| 50 | physical* therap*.mp. | 55962 |
| 51 | occupation* therap*.mp. | 20292 |
| 52 | recreation* therap*.mp. | 279 |
| 53 | Convalescence*.mp. | 7771 |
| 54 | exercis* therap*.mp. | 42947 |
| 55 | social work*.mp. | 27620 |
| 56 | (allied health adj1 (profession* or occupation* or personnel*)).mp. | 14289 |
| 57 | or/38-56 | 644159 |
| 58 | Cardiac Rehabilitation/ | 2533 |
| 59 | (cardiac adj3 rehab*).mp. | 7967 |
| 60 | 58 or 59 | 7967 |
| 61 | Inpatients/ | 22477 |
| 62 | (inpatient* or in-patient* or in patient*).mp. | 1843385 |
| 63 | (inhospital* or in-hospital* or in hospital*).mp. | 133876 |
| 64 | ((institutionalise* or institutionalize* or hospitalise* or hospitalize*) adj3 patient*).mp. | 63783 |
| 65 | or/61-64 | 1966911 |
| 66 | 37 and 57 | 34311 |
| 67 | 60 or 66 | 36654 |
| 68 | 65 and 67 | 9680 |
| 69 | limit 68 to (english language and yr="2000 -Current") | 6816 |

**Appendix B.** Summary of included research studies

| **Author, Year (Country)** | **Study Design** | **Setting** | **Mean Age, Sex (F:M)** | **Reason for ICR** | **Intervention Freq., Duration** | **Intervention Content, Characteristics** | **Staffing Model** | **Key Findings** |
| --- | --- | --- | --- | --- | --- | --- | --- | --- |
| Albert et al., 2007  (USA) 15 | RCT | Tertiary hospital | 60  (26:86) | HF | 30 mins/day, 5 days/week | - Patient education - Physical exercises | - Physician - RN | - VE patients had greater sign/symptom reduction, especially related to edema and fatigue and initiated more actions for edema and dyspnea - VE patients had a higher mean self-care behavior score, reflecting greater self-care adherence - Video education prompts self-care behavior adherence to control worsening signs/symptoms of volume overload |
| Aldana et al., 2003  (USA) 224 | Longitudinal | Acute hospital | 57.7 (N/A) | AMI | 5-14 days | - Physical exercises - Patient education - Discharge planning | - Physician - Research assistants - RN | - Ornish program participants had significantly greater reductions in anginal frequency, body weight, BMI, systolic BP, total cholesterol, LDL cholesterol, glucose, dietary fat, and increases in complex carbohydrates than were documented in the control groups - Patients who choose to participate in the Ornish program experienced greater improvements in CVD risks than patients who choose to participate in no/traditional CR |
| Altenhöener et al., 2005  (Germany) 225 | Longitudinal | Acute hospital | 58  (N/A) | AMI | N/A | - N/A | - Physician | - Higher SES patients who made less use of rehabilitative services than lower and middle SES patients - No social disadvantages in terms of participation in CR programs, which seems to be largely due to the specific characteristics of the German health care system |
| Altenhöener et al., 2012  (Germany) 16 | Observational | Inpatient rehabilitation hospitals | 58.8  (136:407) | MI | 1x/day-2x/week | - Physical exercises - Psychosocial intervention - Patient education - Occupational training | - PT - Physician | - Patients of low SES were less likely to receive a number of therapies with differences being significant for core therapies of CR - Patients of higher SES received fewer hours of dietary counselling - Lectures or other info events were the most attended socio-educational intervention (< than once a week) |
| Amao et al., 2016  (USA) 170 | Case report | Acute hospital | 58 (0:1) | HF | 0-30 days | - Physical exercises - Patient education | - OT - Medical engineer experts | - The combination of CR and LVAD therapy improved his motor paralysis and ADLs - Preoperative early initiation of CR may have an advantage in constructing a post-LVAD rehabilitation program that allows the patient to be discharged to home |
| Amaravathi et al., 2018 (India) 171 | RCT | Acute hospital | 35-65  (0:300) | CAD  CABG | 30 min | - Physical exercises | - PT | - Addition of long‑term yoga-based lifestyle program to conventional CR brings better improvements in QOL and reduction in stress levels at the end of 5 years after CABG |
| Ambrosetti and Mariani,  2007  (Italy) 18 | Observational | CR centre | 65 (52:157) | CAD  PAD | 1x/week | - Patient education | - Dietician | - Patients with CAD or PAD referred to CR programs often display a high cardiometabolic risk and need a broad regimen of dietary modification |
| Ambrosetti et al., 2014  (Italy) 17 | Multicentre survey | CR centre | < 75  (262:1000) | HF | N/A | - Pharmacological intervention | N/A | - HF is a valuable prognostic marker after coronary revascularization - HF should be actively treated during the hospitalization period, and accurately reported at discharge to assist in risk stratification |
| Ambrosetti et al., 2004  (Italy) 19 | Prospective observational | Acute hospital | 65  (49:221) | DVT | N/A | N//A | - Physician | - High rate of DVT in patients entering cardiac rehabilitation after CABG surgery |
| Anchah et al., 2017  (Malaysia) 20 | Pre-post quasi-experimental | Acute hospital | 55 (13:99) | ACS | 0-4 weeks, 2x/week | - Pharmacological intervention - Patient education - Physical exercises | - Pharmacists | - Pharmaceutical care intervention significantly improved HRQoL - This indicates that 6 months of exercise training induces significant improvements in ventricular remodelling and autonomic tone in patients with AMI and PCI - Provision clinical pharmacy services in the early stage of ICR improves scores of physical activities and mental health at 1 year follow-up in post-ACS patients |
| Anderson et al., 2006  (USA) 172 | Retrospective | Acute hospital | 63 (0:304) | CVD | N/A | - Discharge planning | N/A | - Older patients, those with preoperative comorbidities, and those without a caregiver at home experience delays in functional recovery and discharge and are more likely to need transitional CR services - Our findings strongly support the need for alternatives to being discharged home with home health services for elderly cardiac surgery patients who experience delayed functional recovery and have limited social support - Older patients with preoperative conditions, such as COPD, CVD, CHF, and aortic valve disease that contribute to functional decline, are more likely to need transitional CR services |
| Andjic et al., 2016  (Serbia) 21 | Observational longitudinal | CR centre | 52  (6:54) | MI | 45 mins/day, 7 days/week, 3 weeks, | - Physical exercises - Patient education - Psychosocial intervention | N/A | - Short-term exercise training in patients with AMI treated with PPCI is safe and improves functional capacity, as well as test duration, work load and heart rate response - 3 week CR is an effective approach to improve exercise capacity in patients with acute MI treated with PPCI |
| Ansari et al., 2013  (Iran) 22 | Double-blinded RCT | Acute hospital | N/A  (23:37) | AMI | 4 days | - Physical exercises - Patient education - Occupational training | - PT - RN - Psychologist - Nutritionist | - Significant reduction in QT dispersion in patients undergoing ICR but in the control group, QT dispersion was not significantly reduced - Non-diabetic patients showed more reduction in QT dispersion in response to ICR |
| Arai et al., 2018  (Japan) 24 | Retrospective | Acute hospital | 71.9  (64:82) | CVD | N/A | - Physical exercises | - Physician - PT | - Preoperative GNRI was one of the independent predictors for the progression of postoperative CR in patients undergoing cardiovascular surgery - Patients in the good nutrition group had an earlier progression to walking after postoperative rehabilitation a shorter postoperative hospital stay, and a higher rate of discharge home than those in the malnutrition group |
| Arai et al., 2019  (Japan) 23 | Retrospective | Acute hospital | 71.7  (34:44) | CVD | N/A | - Physical exercise | - Physician | - The prevalence of frailty defined by these four measures was higher in the delayed CR group. - The delayed CR group had lower nutritional status, serum hemoglobin level, serum albumin level, and psoas muscle index |
| Asha Jyothi et al., 2012  (India) 25 | Quasi-experimental | Tertiary hospital | 25-40  (18:20) | Mitral valve defect | 0-4 weeks | - Physical exercises | - Physician | - 6MWD, VO2 peak and QOL were significantly increased in both groups after rehabilitation - Study shows that there is an improved exercise capacity in COPD due to peripheral muscle strength training. |
| Awoke et al., 2019 (USA) 26 | Quasi-experimental | Acute hospital | 66  (14:15) | HF | 30 min/day | - Patient education - Discharge planning | - RN | - Improved patient’s knowledge about the disease and self-care maintenance, management, and confidence |
| Aziz et al., 2012 (USA) 27 | Longitudinal | Acute hospital | 58.5  (212: 272) | CAD  ACS | N/A | - Patient education - Pharmaceutical intervention - Discharge planning | - Physician - Physician assistants - RN | n the pre-ACAP and post-ACAP patient  groups, antiplatelet use at admission improved from 50% to 75%  (po.01), ACE-I use improved from 32% to 54% (po.0001),  n the pre-ACAP and post-ACAP patient  groups, antiplatelet use at admission improved from 50% to 75%  (po.01), ACE-I use improved from 32% to 54% (po.0001),   - In pre-ACAP and post-ACAP patient groups, antiplatelet use at admission improved from 50%-75% - Programs like ACAP enhance administration of guidelines-based cardioprotective medications both during hospital stay and at 1-year follow up |
| Babu et al., 2010  (India) 29 | Non-randomized experimental | Acute hospital | 49.7 (5:25) | CAD | 5 days | - Physical exercises - Patient education | - PT - Physician | - Protocol-guided, phase-1 CR produces a much faster return of HR and BP to baseline following the 6MWT   Results suggest that even a progressive exercise program of five days is sufficient to bring about the minimal effects of training in patients with ST-Elevation Myocardial Infarction |
| Babu et al., 2011  (India) 28 | RCT | Tertiary hospital | 57.7  (8:22) | CHF | Up to 10mins/day, 3x/day | - Physical exercises - Discharge planning | - Physician | - After ICR there was a change in the 6MWD between control and experimental group - Early in-patient rehabilitation followed by an 8 week home based exercise program improves function and QoL in patients with CHF |
| Baessler et al., 2001 (Germany) 30 | Case-control | Inpatient rehabilitation hospital | 53  (41: 143) | MI | 3-4 weeks | - Physical exercises - Patient education | - PT | - There was a strong tendency towards fewer recurrent cardiac events (re-myocardial infarction, coronary angioplasty, coronary artery bypass grafting) during follow-up in rehabilitation-siblings - ICR may encourage patients to modify risk factors and enhance the long-term implementation of secondary prevention |
| Bahrami et al., 2017  (Iran) 196 | RCT | Tertiary hospital | 72.3  (90:0) | ACS | 5-10x for up to 1 minute | - Soft tissue manual therapy and other osteopathic manual therapies | - RN - Physician - Specialists in the field of traditional and complementary medicine | - Significant differences in the levels of anxiety and depression were reported between the groups after the intervention - Aromatherapy massage can be considered by clinical RN an efficient therapy for alleviating psychological and physiological responses among older women suffering from ACS |
| Bahrami et al., 2018  (Iran) 197 | RCT | Tertiary hospital | 78.78  (135:0) | ACS | 5-10x for up to 1 minute | - Soft tissue manual therapy and other osteopathic manual therapies | - RN | - Aromatherapy massage significantly decreased fatigue, systolic blood pressure, mean arterial pressure and O2 saturation more than the reflexology intervention - Implementation of both aromatherapy massage and reflexology has positive effects on the fatigue and cardiovascular parameters of patients with ACS |
| Bahrami et al., 2019  (Iran) 195 | RCT | Tertiary hospital | 72.6  (90:0) | ACS | 20 mins | - Soft tissue manual therapy and other osteopathic manual therapies - Pharmacological intervention | - Therapist | - Foot reflexology massage reduced both anxiety and depression in acute coronary patients relative to control patients - The intervention had a large effect on hospital anxiety and depression - Foot reflexology massage is an efficient and safe intervention for alleviating psychological responses among female older adults suffering from ACS |
| Balestroni et al., 2020  (Italy) 31 | Observational retrospective cohort | Inpatient rehabilitation hospital | 79.27  (228:298) | VD | N/A | - Patient education | - Physician - Psychologists - PT - SLP - Dieticians - RN - Caregiver | - Those in psychological treated and non-psychological treated groups had significant improvements in depression scores thus showing the overall efficacy of CR - Concerning the perceived health-related QoL in its five dimensions, rehabilitation had a positive effect enhancing the general perceived quality of life in both psychologically treated and not treated patient - Cardiac comprehensive rehabilitation can significantly improve the psycho-physical health of elderly subjects aged ≥75 who benefit of psychological support |
| Bannerman et al., 2001 (Scotland) 32 | Prospective observational | Acute hospital | 58 (50:169) | MI | N/A | - N/A | - N/A | - There were no significant differences between men and women with regard to change in cholesterol at one year post-CR discharge - Regardless of sex, both men and women displayed a similar proportion of those who returned to work following MI and were still at work 1 year following their diagnosis - Lifestyle changes were recorded in over 90% of men and women who participated in ICR, specifically an increase in the frequency of exercise and decrease in smoking |
| Barth et al., 2005 (Germany) 33 | Experimental | Inpatient rehabilitation hospital | 58.7 (14:45) | CHD | 50 mins, 2-6 sessions for 3-4 weeks | - Pharmacological intervention - Psychosocial support | - Psychologist | - No significant difference between intervention and usual care group in this short-term reduction of depressive symptoms, mental distress and anxiety - Multimodal inpatient rehabilitation reduces depressive and anxiety symptoms in depressed CHD patients in short term independently of an additional psychotherapeutic intervention |
| Bauer et al., 2011 (USA) 34 | RCT | Acute hospital | 63 (23:77) | Post-CABG surgery | 20 mins/day, 2x/day for max 7 days | - Music therapy | - RN | - There was a significant reduction in pain soon after surgery and an overall trend of increases in reported relaxation scores - BP decreased significantly on the 4th day for those who were exposed to musical therapy following cardiac surgery - Patients and families reported a high degree of satisfaction and reception to listening to music or having quiet time following cardiac surgery |
| Ben Gal et al., 2015  (Israel) 211 | Multinational Survey | Acute hospital | N/A  (N/A) | LVAD implantation | 4 weeks | - Physical exercises | - PT - Psychologists - RN - Physician - Exercise physiologist | - This study describes the clear lack of uniformity in ETPs in the LVAD implanting centers - Not all the implanting centers have an exercise training program, and those that do have adopted a local exercise training protocol |
| Benzer et al., 2007  (Austria) 226 | Non-randomized cohort | Inpatient rehabilitation hospital | 50-61  (N/A) | MI | 5x/week for 4 weeks | - Physical exercise program - Psychosocial interventions | - Exercise specialist | - HRQoL scores improved more with inpatient than outpatient exercise based CR by month 1, the improvement was still significant in both groups at month 3 and also in the usual care group when compared to baseline - Significant improvements of 1-month patient-reported outcomes are achieved in patients attending inpatient as well as outpatient CR when compared with no exercise-based CR - Outpatient exercise-based CR leads to a further improvement of patient-reported outcomes |
| Bestehorn et al., 2011  (Germany) 203 | Non-interventional registry | Inpatient rehabilitation hospital | 63.7  (N/A) | STEMI  Non-STEMI | 3-4 weeks | - Pharmacological intervention | - N/A | - Statin therapy increased and LDL cholesterol rates increased - Mean fasting blood glucose decreased from 108 mg/dl to 104 mg/dL, and mean exercise capacity increased from 78 W to 95 W - Those with low education had more diabetes, hypertension, and peripheral arterial disease, had lower exercise capacity, and received less treatment with statins and guideline-orientated therapy in general |
| Bestehorn et al., 2008  (Germany) 227 | Non-interventional registry | CR centre | 62-68 (N/A) | CHD | 3-4 weeks | - Pharmacological intervention - Physical exercise | - N/A | - Compared with patients in CR in 2000, patients in CR in 2005 were significantly older, had a higher BMI, and also showed improved control over BP, lipids, and glucose at the beginning of rehabilitation - CR is able to enhance guideline-based therapy: at discharge, 93% of patients were on statins, 85% on a b-blocker, and more than 75% on ASA - Compared with previous findings, general management of risk factors before initiation of CR, as well as control over lipid, hypertension, and glucose levels at discharge from CR, have improved over time |
| Bierbauer et al., 2020 (Switzerland) 35 | Pre-post | CR centre | 69.1  (4936:8676) | CHD | 21 days | N/A | - Physical exercise | - Men, on average, reached a significantly greater distance on 6MWT pre and post-CR and female gender was negatively associated with exercise capacity improvements - All individuals who participated in CR improved their exercise capacity, and this improvement was especially notable in patients who started CR with lower physical functioning - Individuals diagnosed with coronary heart disease or valve diseases were associated with an increased improvement in exercise capacity, and each day spent in a rehabilitation facility was associated with nearly 2 additional meters walked in the 6MWT - Patients with an additional diagnosis of HF are estimated to have a slightly lower improvement in exercise capacity during CR, however this effect is mostly present in patients <60 years |
| Boitor et al., 2018  (Canada) 228 | RCT | Acute hospital | 65 | CABG | N/A | - Soft tissue manual therapy and other osteopathic manual therapies | - RN - Massage therapist | - Findings suggest that a 20-minute hand massage in addition to routine postoperative pain management can concomitantly reduce pain intensity, pain unpleasantness, and anxiety by two points on average: on a 0–10 scale |
| Borowicz-Bienkowska et al., 2013  (Poland) 36 | Quasi-expermimental, prospective, nonrandomized | Acute hospital | 58  (16:41) | ACS | 2-3 weeks | - Physical exercises - Psychosocial intervention - Patient education | - Physician - Dietician | - In the CR group, comparing baseline with 3 months post-ACS, daily calorie intake was significantly reduced - Short-term CR program following ACS, which includes educational meetings on dietary prevention of atherosclerosis, may result in some favorable and lasting modifications of eating habits of post-ACS patients |
| Borzou et al., 2018  (Iran) 37 | RCT | Acute hospital | 59.3  (28:32) | CABG | 2x/day for 10-15 minutes for three sessions | - Patient education - Physical exercises | N/A | - Patients’ self-efficacy and motivation play an essential role in predicting short-term and long-term compliance to physical activity |
| Boyd et al., 2020 (Australia) 38 | Prospective, single-centre observational | Acute hospital | 65.9 (4:16) | CABG | N/A | - Physical exercise - Pharmacological intervention | - RN - PT | - There was a significant increase in mean arterial pressure during exercise, but this increase in MAP did not lead to an immediate down titration of medication - No clinically significant changes in heart rate or cardiac functioning were observed - Low intensity exercise, such as marching on the spot, did not have long-lasting effects on MAP |
| Boyde et al., 2015  (Australia) 39 | Observational survey | Tertiary hospital | 63  (34:80) | AMI  CVD  ACS | 10 weeks | - Patient education | - RN - Physician - OT - PT - SLP - SW - Dietician | - Patients reported implementing a number of healthy lifestyle changes following discharge including smoking cessation and healthy eating - Attitudes and beliefs regarding ACS showed a significant improvement following discharge - More than one third of patients had inadequate knowledge at discharge, suggesting current education practices may not be meeting needs of patients with MI |
| Broadbent et al., 2009  (New Zealand) 40 | RCT | Acute hospital | 54.7  (12:91) | AMI | 4x, 30 minute sessions | - Patient education | - Psychologist | - At discharge, patients in the intervention group demonstrated changes in causal attributions regarding their MI and higher perceived understanding of their condition, which remained at the 6-month follow-up - Also, better understanding of the information given in hospital, higher intentions to attend cardiac rehabilitation classes, lower anxiety about returning to work, greater increases in exercise, and made fewer phone calls to their general practitioner about their heart condition at follow-up - Brief in-hospital illness perception intervention can change perceptions and improve rates of return to work in MI patients |
| Broadbent et al., 2013 (New Zealand) 41 | RCT | Acute hospital | 58.6  (34:72) | ACS | 30 minutes | - Patient education | - RN | - The intervention group rated the risk information as more easily understood than the control group - Intervention group had increased perceptions of personal control, higher perceptions that a low-fat diet and regular exercise could help their condition, and believed their current illness would be shorter compared to the control group - A computerized cardiovascular risk assessment and management session can help acute coronary syndrome patients understand CVD risk information and improve perceptions of control in the short term, but not change risk perception |
| Brown et al., 2020 (USA) 173 | Case report | Acute hospital | 53  (0:1) | MI | 6 sessions for 4 weeks  . | - Physical exercises | - RN | - Over the six sessions, the patient improved his distance pedaled by 320% and functional capacity by 1 metabolic equivalent - There were no additional complications MI-related readmissions |
| Brzek et al., 2002  (Poland) 174 | Non-randomized control trial | Acute hospital | 58 (0:61) | MI | 1-7 days | - Physical exercises | - Physician - RN - PT | - Group B showed presented lower values of systolic and diastolic blood pressure after exercise when compared to Group A, indicating that sympatholytic drugs reduce blood pressure and lower risk of sudden cardiac death in MI patient |
| Busch et al., 2009 (Germany) 42 | Case series | Acute hospital | 39 (1:3) | CHD | 20 min sessions, 5x/week | - Physical exercise | - Physician - Sports-therapists | - Doctors and sports therapists perceived the bicycle ergometer as being useful, usable, and operable and all medical staff showed good to excellent acceptance of the system, illustrating that it could be implemented more widely |
| Busch et al., 2012  (Germany) 43 | RCT | Acute hospital | 78.5  (119:54) | CAD | 30 mins, 2-3x/week | - Physical exercise | - PT | - There were significant improvements in all measured variables (i.e., functional capacity, TUG time, and maximal relative workload in the intervention group than in the control group) in very old adults participating in CR soon after CABG |
| Cacciatore et al., 2012 (Italy) 44 | Non-randomized control | Acute hospital | 72.9  (120:130) | CAD | 2x/day up to 30 mins for 1 week | - Physical exercises | - PT - CR instructor | - ICU stay greater than 3 days negatively associated with 6MWT, Barthel Index at entry and Barthel Index percent recovery, whereas it is positively associated with a longer rehab length of stay - Pre-operative comprehensive assessment in the elderly could help to identify predictors of long ICU stay after cardiac surgery |
| Cai et al., 2019 (China) 45 | Retrospective cohort | Acute hospital | 57.5  (132:387) | MI | N/A | - Physical exercises | N/A | - Individualized exercise prescription reduced the incidence of repeat cardiovascular events, as predicted by VO2, RER, and PETCO2 - There was no significant change regarding the incidence of death following CR, which may be due to the fact that other elements of CR (education, smoking cessation) may contribute more to all-cause mortality than physical exercise - Increased PETCO2 was a predictor of prognosis with STEMI, as increased PETCO2 is associated with improved prognoses |
| Callahan et al., 2000  (USA) 175 | Case report | Tertiary hospital | 20  (0:1) | Noonan syndrome | 14 sessions, up to 30 min/sessions | - Physical exercises - Occupational training - Patient education - Psychosocial intervention | - Physician | - Patient benefited from PT and OT, exhibiting a marked increase in his exercise tolerance, endurance, and aerobic capacity, as well as mastering his participation in his own home management skills and basic ADLs - Psychological counseling and vocational rehabilitation counseling were crucial in helping him to obtain the self-esteem and the self-confidence required to continue his pursuit of an appropriate career choice |
| Cameron et al., 2005 (New Zealand) 46 | Non-randomized control trial | Acute hospital | 54.74  (18:47) | MI | 3 sessions, 30-40 minutes | - Patient education | - Psychologist - RN | - Results indicate that the illness perceptions-based education intervention (relative to standard care) increased cardiac rehabilitation attendance and reduced self-reported disability during the three months following the MI |
| Caminiti et al., 2012  (Italy) 47 | Cohort | Acute hospital | 72.1 (28:53) | CHF | 30-60 minute sessions, 2x/day, 6 days/week | - Physical exercise - Psychosocial intervention | - PT | - Cognitive impairment is a marker of advanced CHF and is an independent predictor of lower exercise recovery after CR |
| Carless et al., 2006  (United Kingdom) 229 | Survey | Tertiary hospital | 62.5  (N/A) | MI | 1x/week | N/A | N/A | - Patients with low self-directedness combined with high harm avoidance reported significantly higher levels of anxiety, depression and lower levels of satisfaction with life. |
| Cartledge et al., 2018  (Australia) 48 | Prospective interventional | Acute hospital | 65.1  (33:50) | N/A | 20-60 mins, 2x/week for up to 4-6 weeks | - Patient education - Physical exercise | - PT - Dieticians - Psychologists - Physician | - Cardiac patient participation rates in CPR classes were high (n = 56, 72.7% of eligible patients) with a further 27 family members attending training - Findings suggest that CR is an effective and feasible environment to promote CPR training |
| Chockalingam et al., 2020  (India) 202 | Multicentre retrospective survey | CR centre | 60 (N/A) | CAD | 5-40 min sessions, 1-3 sessions/ week | - Physical exercises | - RN - Exercise specialist - OT - Physician - PT - Yoga instructor - Psychologist | - Findings suggest that CR provides significant improvement in anthropometry, BP, functional capacity and cardiac function |
| Choo, Burke and Hong,  2006  (South Korea) 230 | Non-randomized pre-post | Urban medical centre | 56  (11:49) | MI | 3x/week, 60 min session for 8 weeks | - Physical exercises | - Dietician - Exercise physiologist - RN | - After adjusting for education level, the overall QLI, health/functioning and psycho/spiritual scores showed greater increases in the CR group than the Control group - Significant improvements in V02 peak, anaerobic threshold, and maximal exercise duration in CR compared to the control - Findings suggest that the Korean CR can lead to significant improvements in HRQOL outcomes and exercise capacity. |
| Chu et al., 2014 (USA) 49 | Retrospective cohort | Inpatient rehabilitation hospital | 64.2 (11:47) | LVAD implantation | 10-30 days | N/A | N/A | - The average time between LVAD implantation and rehabilitation admission was 27 days and the average LOS in rehabilitation was 20 days - 36% of patients required at least on transfer back to acute care during their rehabilitation course, and over half of these individuals then completed rehabilitation and displayed greater total FIM gains than patients who did not require transfer - All patients, regardless of whether they were transferred back to acute care, displayed improvements in FIM following CR by at least 20 points |
| Compostella et al., 2017  (Italy) 176 | Pre-post | Acute hospital | 60 (0:139) | AMI | 30-60 mins/day, 6 days/week for 2 weeks | - Physical exercises | N/A | - After cardiac rehabilitation, they walked shorter distances at the final six-minute walk test; at CPET they sustained lower workload and reached lower oxygen uptake at peak effort - Presence and degree of erectile dysfunction may constitute simple clinical indicators of the degree of deterioration of the microvascular structure and regulation that could entail reduced effort tolerance even after a period of intensive cardiac rehabilitation |
| De Gruyter, Ford and Stavreski, 2016  (Australia) 210 | Cost benefit analysis | Acute hospital | N/A | AMI | N/A | N/A | N/A | - Greater uptake of cardiac rehabilitation can reduce the burden of disease, directly translating to benefits for society and the economy - Findings support the need for greater promotion, routine referral to be made standard practice and implementation of reforms to boost uptake |
| Dehbarez et al., 2015  (Denmark) 252 | RCT | Acute hospital | 63  (N/A) | IHD | 1.5 hr sessions, 1-3x/week for 8 weeks  3x a week | - Physical exercises - Patient education - Discharge planning | - RN - PT | - No significant differences in either costs or outcomes between learning and coping strategies and standard education methods from a societal perspective during 5 months follow-up |
| Duru et al., 2000  (USA) 177 | RCT | Regional rehabilitation centre | 56  (0:12) | MI | 3hr/week-1 hr/day for 2 months | - Patient education - Physical exercises | - Physician - Exercise specialist | - CR with a 2-month high-intensity exercise training program resulted in significant improvements in physical fitness and clinical variables |
| Eichler et al., 2017 (Germany) 50 | Prospective cohort multicentre | Rehabilitation centre | 80 years (71:65) | Valvular surgery | 3 weeks | N/A | - Physical exercises - Patient education | - Between admission to and discharge from CR, patients improved their 6MWD, feelings of anxiety/depression, maximum exercise capacity, and subjective perceptions of frailty - Age and educational level were both associated with a reduced 6MWD, obesity, and preserved cognitive function - Cognition, nutrition, and ADLs all predict the change of functional status and QoL |
| Ekman et al., 2012 (Sweden) 51 | Observational | Acute hospital | 78.5 (83:165) | CHF | N/A | - Physical exercises | - RN - Physicians - PT - OT - Patient representatives | - ADL levels and HRQoL were better at discharge for those who received person-centred care - LOS was reduced by more than 2 days in those who received person centred care |
| El-Kader, 2011 (Egypt) 231 | RCT | Acute hospital | 40-55 (N/A) | CABG/valvular surgeries | 1-2x/day for up to 10 days | - Physical exercises | - PT | - There was a significant improvement in blood gas levels by the 10th day of ICR and were comparable to preoperative levels, suggesting that chest physiotherapy and breathing exercises can improve long-term prognosis following coronary revascularization - The use of incentive spirometry is feasible and helps to improve blood gasses |
| English and Speed, 2013 (USA) 52 | Retrospective | Acute hospital | 60.55 (7:13) | LVAD implantation | 12 days | - Discharge planning | N/A | - Acute anemia was one of the most common complications that developed following LVAD implantation in the hospital, with some patients required a blood transfusion to treat the anemia - Most patients had improved FIM score from admission to ICU to discharge from rehab, with a media FIM score change of 21 - Ambulation distance and stair climbing ability also improved from admission to discharge - Through the creation of a discharge checklist with patients and families that includes information on how to navigate post-LVAD implantation life and complications, individuals are better equipped to provide home care |
| Eto et al., 2004 (Japan) 53 | Randomized intervention | Inpatient rehabilitation hospital | 59 (1:35) | AMI | 30 min sessions 2x/day for 2 weeks | - Physical exercise | N/A | - PETCO2 levels during exercise increased due to physical training following AMI, and this increase was associated with a greater increase in cardiac output at peak exercise - Despite the workload increasing throughout the weeks of training, maximum HR levels remained stable, illustrating an improvement in exercise tolerance |
| Eysenbach et al., 2014  (Germany) 54 | Sequential controlled trial | Inpatient rehabilitation centres | 53.2  (292: 279) | CAD | N/A | - Patient education | N/A | - Usage of the lebensstil-aendern (lifestyle-change) website corresponds to more positive lifestyle changes |
| Fernandes et al., 2019 (Portugal) 55 | Longitudinal | Acute hospital | 64 (36:85) | ACS | 2 sessions (1 hr 15 mins each) | - Patient education | N/A | - Health education regarding ACS and its treatment helped improve patient knowledge in the two month periods following discharge - Healthy habits, such as having a healthier diet, smoking cessation, and overall improvement in exercise were also maintained up to 2 months following discharge - The present intervention helped to reduced consumption of fats and salt, significantly increased regular exercise, and led to an increased frequency of BP measurement |
| Fiorina et al., 2007 (Italy) 56 | Observational | Acute hospital | 64  (499:1123) | CABGValvular surgeries | 60 min sessions, 2x/day | - Physical exercises | N/A | - Nearly a fifth of individuals showed a reduction in exercise tolerance following CR, however it is unclear why this is - Older women benefited the most from CR and displayed a greater improvement in exercise tolerance compared to younger men - Patients with low functional capacity at baseline showed the largest increase in the final 6MWT |
| Flynn et al., 2007 (USA) 207 | Cohort | Acute hospital | N/A | ACS | N/A | - Patient education | - RN - Physician | - The most effective implementation of CR involves clinicians who have exiting knowledge, skillsets, and relationships with cardiovascular patients - Partnerships within multidisciplinary teams ensures that a secondary prevention treatment plan is put in place - Bedside nursing staff play a large role in identifying appropriate patients for CR referrals, and RN-to-RN consultation promotes communication and collaboration that helps individualize the CR care |
| Forestieri et al., 2016  (Brazil) 57 | RCT | Tertiary hospital | 46.2  (4: 14) | HF | 20 mins/day | - Physical exercise | N/A | - Both groups demonstrated an increase in six-minute walk test distance after the experimental procedure compared to baseline; however, only the intervention group had a significant increase - Stationary cycle ergometer exercise training shows positive results on exercise capacity and inspiratory muscle strength in patients with heart failure awaiting cardiac transplantation while on intravenous inotropic support |
| Forrest et al., 2015 (USA) 58 | Retrospective review | Inpatient rehabilitation hospital | 69  (22:43) | CHF | 9-13 days | - Patient education | - RN | - FIM scores improved from hospital admission to rehabilitation discharge with an average: FIM gain of 22.8 points - Average LOS in acute care was 9 days, and nearly all patients were discharged home following their ICR stay, and all patients were discharged to their home within 13 days of admission - It is vital for the RN in acute care to coordinate with rehabilitation RN to ensure patients and their families understand the LVAD system and can recognize and respond to malfunctions and medical emergencies |
| Frengley et al., 2011  (USA) 59 | Non-interventional retrospective | Acute hospital | 68.9  (162:202) | CABG | 2-3 hours/day, 7x/week | - Patient education | - Physician - PT - OT - SLP - RN - Nutritionist - Psychologist - SW - Therapeutic recreation therapist - Exercise physiologist | - Post-acute ICR programs equally benefited both elderly patients and younger patients - Rehab programs are valuable in the continuum of care for elderly patients, especially those who are not ready for discharge to home following a serious cardiac event |
| Frizzelli et al., 2008 (Italy) 60 | Prospective multisite | Acute hospital | 67.8 years (240:575) | Valvulvar surgery | 5-7 days | - Pharmacological intervention | N/A | - Almost half of patients admitted across 5 hospitals had asymptomatic deep vein thrombosis as a result of central venous catheterization following valvular surgeries - Despite the high rate of deep vein thrombosis, all patients were treated with antiplatelet therapies until the 3 month post-discharge visit which helps to prevent further DVTs as a result of central venous catheter |
| Froger-Bompas et al., 2009 (France) 178 | Observational non-randomized | Acute hospital | 53 (0:136) | ACS | 6 sessions across 3 weeks | - Patient education | - Dieticians | - CR helps to reduce all-cause mortality due to the reduction in major risk factors (which included educating participants on these risk factors) - Participants in the present study illustrated a decrease in saturated fatty acids following CR, mostly due to a drop in butter consumption |
| Fukui et al., 2016  (Japan) 61 | Prospective controlled trial | Rehabilitation centre | 68  (30:11) | Angioplasty | 1 week | - Physical exercises | - PT - Physician - Pulmonary hypertension experts | - The combination of BPA and subsequent CR is a new treatment strategy for inoperable CTEPH to improve exercise capacity to near-normal levels and HF symptoms, with a good safety profile |
| Galante et al., 2000 (Italy) 62 | Survey | Acute hospital | 67.6 (39:166) | CABG surgery | 14 days, 2 sessions/day lasting 20-30 mins | - Physical exercises - Pharmacological intervention | N/A | - Patients with either diabetes, hypertension, or hyperlipidemia illustrated an incidence of cardiac arrhythmias during CR that was significantly higher than that of patients without any of these conditions, indicating that these conditions should be considered to be markers of increased risk for arrhythmias - Among patients that complied with CR, more than a quarter suffered important arrhythmias |
| Gecaite et al., 2019 (Lithuania) 232 | Cross-sectional | Inpatient rehabilitation hospital | 52 (N/A) | ACS  CAD | N/A | N/A | - Psychologist - Cardiologist | - Nearly one third of participants had clinically significant symptoms of anxiety, whereas only 6% of participants reported significant symptoms of depression - Cardiovascular reactivity to the stress-test were significantly associated with several HRQoL domains, including role limitation due to emotional problems, social functioning, and vitality - Prolonged HR recovery was associated with worse social functioning and lower levels of vitality, age, gender, smoking history, mental health symptomology, and type-D personality traits |
| Ghanbari-Firoozabadi et al., 2019  (Iran) 22 | Report | Acute hospital | N/A | N/A | N/A | - Patient education | - Physicians - Physical medicine rehabilitation specialist - Outpatient and inpatient resident medical officers - Psychiatrists - Nutritionists - Psychologists - PT - SW | - Given the facilities and training programs mentioned above, the rate of patient referral to the center by the inpatient CR team during the short life of CR in this center was 60%, the patient participation rate was 6.9% and the enrollment rate was 55% - It is necessary to develop the standard of CR in Iran based on the culture and socio-economic status of Iranian community |
| Ghanbari-Firoozabadi et al., 2020  (Iran) 63 | Survey | CR centre | 63.13  (370:730) | MI  CAD  Angina  HF | N/A | N/A | N/A | - Top barriers to CR include not knowing about CR, cost and lack of encouragement from physicians - Four-factor, 18-item Cardiac Rehabilitation Barriers Scale (CRBS-P) had good psychometric properties and can be reliably and validly used to measure CR barriers in Iran and other Persian-speaking populations |
| Golabchi et a., 2012 (Iran) 179 | RCT | Inpatient rehabilitation hospital | 53.2  (0:29) | MI | 60-90 minute sessions, 24 sessions across 8 weeks | - Physical exercise - Patient education | - Physician | - 8 weeks of inpatient CR did not significantly affect diastolic function indices (as determined by echocardiographic tests), particularly in those with chronic heart failure and hypertrophic cardiomyopathy - ICR did positively affect functional capacity and maximal and resisting HR |
| Gonçalves et al., 2010  (Brazil) 64 | RCT | Acute hospital | 59  (11:36) | CABG | 1x/day | - Physical exercise | - PT | - Short-term supervised physiotherapy exercise protocol during inpatient CR improves CAR at the time of discharge - Exercise-based inpatient CR might be an effective non-pharmacological tool to improve autonomic cardiac tone in patient’s post-CABG |
| Goodwin-Esola et al., 2014 (USA) 180 | Case report | Acute hospital | 83 (0:1) | MI | 15 days | - Physical exercise | N/A | - As this patient endured both MI and suffers from Parkinson’s, a notable decline in FIM score was observed during his stay in the rehabilitation facility and by day 12 of his stay, he regressed to a maximal assist level for transfers and mobility - There is a strong need for inter- and intra-hospital handoff procedures, especially in cardiac patients with severe comorbidities and complications following MI |
| Goto et al., 2007 (Japan) 208 | Survey | Rehabilitation centre | N/A | AMI | N/A | N/A | N/A | - Implementation rate of all CR services, including inpatient, were lower than that of cardiac surgeries in cardiology hospitals in Japan - The quality of the CR programs was described as poor - Major barriers include lack of staff, space, and equipment, and not meeting the CR facility standards to receive reimbursement from the Japanese health insurance system |
| Graversen et al., 2020  (Denmark) 205 | Cross-sectional | Acute hospital | 65-74 (N/A) | ACS | N/A | N/A | N/A | - High income and education level had the strongest association of referral to CR - Therefore, this study suggests income and education to influence all phases in the referral process to CR after ACS |
| Griffo et al., 2013 (Italy) 65 | Multicentre prospective longitudinal | Acute hospital | 66 (262:1000) | CHD | 19 days | - Patient education - Physical exercise - Pharmacological intervention | N/A | - At 1 year post-discharge, nearly all patients showed a good adherence to secondary preventative drug treatment that was prescribed during their inpatient stay, and mean dosage increased significantly for ACE inhibitors - Lifestyle habits improved during the study and adherence to behavioural recommendations was sustained at 1 year follow up, including a reduction in smoking behaviours, adherence to a healthy diet, and increased physical activity levels - 11% of individuals had one or more repeat cardiac events |
| Hamberecht et al., 2000 (Germany) 181 | RCT | Acute hospital | 56 (0:40) | CHF | 4 weeks | - Pharmacological intervention - Physical exercise | N/A | - Individuals who received L-arginine supplementation had a significant vasodilative response following CR, and this response was enhanced in those who received both physical training and L-arginine, illustrating that supplemental L-arginine improved endothelial function - Maximal handgrip improved for all individuals who received L-arginine, and it was even more pronounced in those who received L-arginine and exercise training, illustrating the additive effect of both interventions |
| Hansen et al., 2011 (Belgium) 66 | RCT | Acute hospital | 60 (3:44) | CAD | 40 minute sessions, 3x/week for up to 6 weeks | - Physical exercises | - PT - Physician | - As a result of exercise, adipose tissue mass decreased significantly, and total body lean tissue mass increased more so with resistance training rather than aerobic training yet despite this lean tissue mass, no clinically relevant findings were observed with the addition of resistance training - Exercise significant improved HR, VO2peak and VO2 max, regardless of aerobic or resistance training - HDL levels significantly increase when following aerobic and resistance training |
| Hanson et al., 2016 (Australia) 67 | Repeated measures | Acute hospital | 68 (17:45) | CAD | N/A | - Physical exercises | N/A | - While there was a trend for an increase in the distance walked from the first to the third data collection point, the distance was not significant - The mean distance walked improved by 17 meters, which is statistically significant yet not clinically significant – participants ideally must be displaying a change of at least 23 meters between two time points |
| Harada et al., 2017 (Japan) 68 | Pre-post | Acute hospital | 72 (135:187) | CVD | 20-40 mins for 28 days | - Pharmacological intervention - Physical exercise - Patient education | N/A | - Following CR, weight and body mass decreased significantly yet nutritional status did not change – daily caloric intake as well as proteins and lipid intakes significantly increased following CR - Gait speed and muscle strength, including hand grip and leg weight, improved significantly following CR |
| Helmy et al., 2019 (Egypt) 182 | RCT | Acute hospital | 54 (0:45) | CABG surgery | 1 session/day, 3-5x/week for 4 weeks | - Physical exercise | N/A | - The degree of sternal separation was significantly lower in those who received low level laser therapy compared to controls and those who received standard CR - Control, standard CR, and laser therapy + standard CR all displayed statistically significant increases in ADL performance and decreases in pain scales - The present findings suggest that low-level light therapy in the early post-op period is an effective prophylactic strategy to prevent sternal wound healing complications and decrease pain perception, thus decreasing both physical and psychological burdens following cardiac surgery |
| Herdy et al., 2008 (Brazil) 69 | RCT | Acute hospital | 60 (16:40) | CABG surgery | 6-7 days | - Physical exercises | - PT | - Pre and post-operative rehabilitation resulted in significant reduction of LOS in acute care and also reduced the incidence of secondary post-operative complications, such as pneumonia - A pre-and post-cardiopulmonary rehabilitation program such as this may also help to reduce the incidence of arrhythmia following cardiac surgery |
| Hildebrandt et al., 2019 (Germany) 70 | Retrospective single-centre | Inpatient rehabilitation hospital | 50.7 (10:59) | DCMP | 3-5x/week 30 mins/session for 3 weeks | - Physical exercise - Patient education - Occupational training - Soft tissue manual therapy and other osteopathic manual therapies | - Physician | - The average CR duration was 28 days, and it usually started within 44 days of LVAD implantation - With the additional weight of LVAD equipment, nearly all patients found themselves needing massages as well to deal with back and neck complaints - All patients who received CR also received educational lessons around how to live a self-determined, independent live post-LVAD, with an average teaching time of 14 hours - When compared to the general CR population, the volume of therapeutic treatments is lower in LVAD patients |
| Hirschhorn et al., 2008 (Australia) 71 | RCT | Acute hospital | 62.9 (12:80) | CABG surgery | 2x/day, 10 min sessions across 5 days | - Physical exercise - Patient education - Outpatient referral | - PT | - Daily physiotherapy exercises, most commonly walking, coupled with breathing training and education significantly improved sub-maximal exercise capacity at discharge from hospital, yet in the absence of continual exercise supervision, these benefits were not sustained at the 4 week follow up, suggesting that the effect of early walking exercises require reinforcement - Nearly 10% of patients re-presented to the hospital following discharge, illustrating a relatively high instance of repeat cardiac events resulting in hospitalization - Familiarity with exercises/CR programs can smooth the transition into outpatient CR programs |
| Hofer et al., 2009 (Austria) 72 | Longitudinal observational | Inpatient rehabilitation hospital | 60.9 (119:232) | MI Angina  VD | 4 weeks | N/A | N/A | - There was a significant short term improvement in HRQoL over the one month ICR, however over the 2 year follow up period, HRQoL significantly decreased but were still higher than baseline scores - No long-term improvements were observed in individual’s reporting of self-care behaviours, pain, or mobility - Those with vavular diseases showed the least amount of improvements in HRQoL - Younger patients derive the greatest long-term benefit from ICR in terms of improved HRQoL |
| Hojskov et al., 2020 (Denmark) 73 | RCT | Acute hospital | 65 (20:132) | CABG surgery | 4 weeks | - Exercise training - Patient education - Discharge planning | - RN - Physician - PT | - Non-adherence to mindfulness training was 87% in hospital and 70% after discharge, with males being more likely to not adhere to psychological interventions - Non-adherence was associated with education level and diabetes, as those with university level education being more adherent than others - Social support was found to be associated with adherence, with the presence of HCPs positively influencing participation - Belief in CR efficacy predicts adherence, illustrating that patients need to understand the importance of CR - Being overweight/fatigue also predicts non-adherence, however this was more notably in outpatient settings |
| Hotta et al., 2013 (Japan) 74 | Case series | Acute hospital | 66 (8:24) | AMI | 15 mins | - Physical exercise | - PT | - A single stretching session following cardiac surgery did not produce significant changes in HR, systolic BP, or other vascular indices - Vascular endothelial functioning and circulation were improved following a single stretching session, however it is unclear how long this improvement lasted, illustrating an acute effect |
| Huffman et al., 2011 (USA) 75 | Randomized prospective trial | Acute hospital | 62.3 (85:90) | MI  CHF | 5 days | - Patient education - Psychosocial intervention - Discharge planning | - SW - Patient care manager - Physicians - Psychiatrist | - Patient who received collaborative care were significantly more likely than patients who received standard care to be prescribed adequate depression treatment upon discharge (i.e. pharmacotherapy) - Cardiac inpatients did not have brief or mild mood symptoms, but rather had durable, recurrent, and moderate-severe depression, which was also associated with anxiety and poor HRQoL - Reports of suicidal ideation in inpatients appear to signal distress rather than suicidal intent - Not all patients received adequate treatment, even in the collaborative care group, as some patients decline psychotherapy and treatment entirely |
| Istvanovic et al., 2011 (Croatia) 76 | Pre-post | Acute hospital | 51 (53:263) | MI | 6x/week for 3 weeks | - Physical exercises - Patient education - Psychosocial intervention | - PT - Psychologist - Physician | - The average LOS in acute care was 11.9 days - BP, triglyceride, and blood glucose levels significantly decreased following ICR - Fatigue perception following ergometry testing was significantly higher following CR, and those who participated in CR reported it to be more exhausting than expected - At the end of ICR, there was a significant decrease in type D personality characteristics, which can be attributed to the individualized psychological interventions |
| Jackson et al., 2018 (Australia) 201 | Survey | Rehabilitation centre | N/A | N/A | 6-10 sessions | - Physical exercise - Patient education - Discharge planning | - RN - PT - Exercise physiologist - Physician - Pharmacist - Dietitian - SW - OT - OTA/PTA - Psychologist | - Nearly all CR programs in Australia educate patients on diet, physical activity, understanding heart disease, mental health and wellness, whereas only a minority discuss emerging topics such as resumption of sexual activity and return to work discussions - Nursing professionals were the most frequently employed professions for CR programs, however there is a mean number of 6 different disciplines employed in every CR program - The average number of CR sessions in Australia is 9, whereas in Canada, majority of programs run for 2-6 months |
| Kamiya et al., 2019  (Japan) 206 | Survey | Rehabilitation centre | N/A | HF | N/A | N/A | N/A | - Multidisciplinary team-based care is ahead of standard HF care – minimizes risk of rehospitalizations and risk of death - Having registered CR instructors and RN certified in HF care facilitated implementation of inpatient and outpatient multidisciplinary HF care - Resource availabilities such as the number of hospital beds, CCU beds, available CR staff were all associated with the implementation of ICR - Despite high implementation rates, patient participation rates were still low due to barriers at three levels: patient, provider and system - Patient: Low SES, older age, time constraints, lack of interest and comorbidities - Provider: Lack of physician referrals, limited resources - System: Financial and infrastructure constraints |
| Kamke et al., 2003 (Germany) 77 | Observational | Inpatient rehabilitation hospital | 60 (31:87) | CAD | 15 minute sessions, 1-3x/day | - Patient education - Physical exercise | - Physician | - 10% of patients experienced ICD malfunctions, but physical training and other activities of the CR program were not linked to cardiac events of ICD therapy delivery - Nearly 75% of participants participated in a group psychoeducational session, whereas 50% of patients partook in an individual psychosocial education session - Only 15% of patients partook in one-on-one physical exercise training due to being critically ill with advanced, long-term comorbidities - Fear of the device itself was a main concern that was brought up, highlighting the need for education for both patients and family members regarding heart devices and cardiac conditions |
| Kanazawa et al., 2017 (Japan) 78 | Retrospective cohort | Rehabilitation centre | 56  (47:1652) | CAD | 160 min | - Physical exercises | N/A | - The median hospitalization duration was 8 days, with LOS varying depending on the diagnosis and patients who underwent CABG remained in the hospital 3-fold longer than those who underwent PCI - Patients receive over 200 extra minutes, on average:, of CR if they receive both inpatient and outpatient CR - Patients with STEMI are more likely to undergo ICR, and those who received CABG were more likely to receive ICR than those who received PCI - CR referral by physicians is more likely to lead to uptake, especially for those who did not receive ICR - Japan noted a shortage of CR hospitals, leading to a lack of opportunity to receive CR - Utilization of ICR depends on cardiac condition severity, with more severe conditions being more likely to receive CR |
| Kanazawa et al., 2020 (Japan) 233 | Retrospective cohort | Rehabilitation centre | 66.2 (N/A) | AMI | Up to 4 weeks | - Physical exercise - Patient education | N/A | - ICR patients stayed longer in hospitals and were more likely to be treated with pharmaceuticals than non CR participants, illustrating ICR participants may have more severe cardiac conditions than non-participants - The average hospital LOS was 2 weeks and CR sessions were on average 34 mins/session - The incidence of revascularization and all cause re-admission were significantly lower in the ICR participants than those who do not partake in CR, with roughly 20% of risk being reduced due to CR - Individuals who attended more than 8 sessions of CR had the most risk reductions for revascularization, however risk reduction was apparent in those who also attended 2 CR sessions |
| Karakas et al., 2014  (Germany) 79 | Prospective cohort | Acute hospital | 58.9  (156: 892) | CAD | 3 weeks | - Patient education | - Physician | N/A |
| Karaszewski 2014 (Poland) 183 | Pre-post | Acute hospital | 63 (0:42) | IHD | 2x/day up to 30 mins each session | - Soft tissue manual therapy and other osteopathic manual therapies | N/A | - Arterial pressure and heart rate decreased significantly from pre-to post CR - Modified rehabilitation models that have more frequent exercises with longer durations help to improve levels of perceived exertion, heart rate, 6MWD, and overall exercise tolerance in comparison to a standard rehabilitation program |
| Katano et al., 2018 (Japan) 81 | Retrospective cohort | Acute hospital | 75 (74:41) | HF | 5x/week | - Physical exercise - Patient education | N/A | - Prior to CR, 56% of participants were malnourished and only 4% of participants were sufficiently nourished - Low total energy intake, starvation-related malnutrition, and cardiac function severity were all associated with functional dependence at discharge - CR during hospitalization failed to improve physical status at discharge to a level of functional independence in over half of patients, although significant improvement in functional status was observed in patients with poorer nutritional status - The addition of nutritional interventions alone to CR are unlikely to be sufficient to reverse the clinician conditions of many HF patients, such as orthopedic problems |
| Kato et al., 2019 (Japan) 80 | Retrospective cohort | Acute hospital | 67 (10:57) | VT | 1-2x/day 5x/week | - Physical exercises | - Physician - RN - PT | - Median hospital LOS was significantly longer for those who received CR because patients who met rehabilitation group criteria took more time to recovery their physical strength - Reoccurrence risk was clinically significant such that close to 30% of participants displayed repeated arrhythmias throughout CR, however reoccurrence risk was not increased by physical rehabilitation - The median interval between primary treatment and initiation of CR was 2 days, with reasons for delays being attributed to other medical procedures, instability in VT, and weekend hospital management - The median time of CR was 9.9 h and the median number of days was 10 |
| Kim et al., 2014 (Korea) 184 | Case report | Acute hospital | 50 (0:1) | DCMP | 50 min sessions, 5x/week for 8 weeks | - Physical exercise - Discharge planning | N/A | - Following CR, the patients’ scores assessing cognitive function doubled and the individual could independently perform ADLs - Exercise capacity also increased following the 8 week ICR, as illustrated by improved LVEF and BP functioning |
| Kim et al., 2020 (Korea) 82 | Prospective survey | Acute hospital | 63 (41:132) | CAD | Up to 1hr/day | - Physical exercise - Patient education | - Dietician - RN - PT - Physician | - Having symptoms prior to PCI, having a higher SES, and perceiving the illness as more severe were all statistically associated with a greater odds of attending the CR program - Those who attended CR obtained significantly more knowledge in the following areas: CR risk factors, healthy lifestyle, medication management, and management of emergency situations - With prior symptom appearance being strongly associated with CR attendance, it is assumed that those who do not experience symptoms tend to lack the motivation to sustain lifestyle changes |
| Kim et al., 2020 (Korea) 200 | Prospective | Acute hospital | 61 (13:34) | ACS | 50 min sessions, 3 days/week for 6 weeks | - Physical exercise | N/A | - Aerobic exercises at both a moderate and high intensity improve the following indicators: HDL/LDL levels, VO2 Max, LVEF, and heart rate - Resting heartrate decreased significantly for those who participated in both moderate and high intensity training |
| Kocur et al., 2009 (Poland) 185 | Non-randomized controlled trial | Inpatient rehabilitation hospital | 51-54  (0:80) | PCI | 5x/week for 3 weeks | - Physical exercise | - PT | - Patients displayed an increased exercise capacity measured by treadmill exercise test (metabolic equivalents) and physical fitness (e.g., 6MWD) |
| Kozomara and Krstic, 2017 (Serbia) 83 | Prospective clinical trial | Inpatient rehabilitation hospital | 65 (36:48) | Revascularization surgeries | 40-50 mins sessions, 2x/week for 3 weeks | - Physical exercises | N/A | - There was a significant difference in muscular strength of the upper and lower limbs, exertion tolerance, and duration of exercise tolerance following CR - There are more favourable effects for exercises that incorporate dynamic resistance training in regards to improving muscle strength |
| Lau-Walker et al., 2016 (United Kingdom) 84 | Evaluative | Acute hospital | 58  (16:58) | MI | N/A | - Patient education | - RN | - Patient education improved patient’s QoL and knowledge about the disease - RN recognized the benefit of patient education but also required spending more time with each patient |
| Macchi et al., 2007 (Italy) 85 | RCT | Inpatient rehabilitation hospital | 67.5 (95:205) | CABG | 2hrs/day for 3 weeks | - Physical exercise - Patient education - Psychosocial intervention - Pharmacological intervention | - N/A | - Nearly all participants displayed an increase in walking speed and distance following CR; those who worsened were found to not comply with the CR program - CR patients were found to be immediately less satisfied with their physical functioning, but displayed improvements in satisfaction and bodily pain at 1 year follow up - Anemia was significantly higher in the older cohort of patients, with CR not playing a significant role in addressing the comorbidity |
| Macchi et al., 2009 (Italy) 86 | Pre-post | Rehabilitation centre | 75  (45:86) | CABG  Valvular surgeries | 2x/day for 3 weeks | - Physical exercises - Pharmacological intervention - Patient education - Psychosocial intervention - Discharge planning | - PT | - CR participation led to increased 6MWD, improved symptoms of hypertension, diabetes, dyslipidemia, increased smoking cessation and controlled weight, and improved balance and coordination - Positive outcomes from CR participation were maintained up to 1 year after discharge - Older age, female sex, and depression seemed to predict failure in promoting an active lifestyle in elderly patients |
| Machado et al., 2019  (Portugal) 87 | Cross-sectional descriptive, exploratory | Acute hospital | 69  (28:75) | ACS | 12-24 hours | N/A | - Physician - RN - Cardiopneumonology technician - PT | participants con-  sidered doctors and RN as the professionals who contribute the most to the  increase of their health literacy.  participants con-  sidered doctors and RN as the professionals who contribute the most to the  increase of their health literacy.  participants con-  sidered doctors and RN as the professionals who contribute the most to the  increase of their health literacy.   - Results demonstrate the low levels of health literacy of CR patients - Participants considered physicians and RN as the professionals who contribute the most to the increase of their health literacy - Health professionals have the opportunity and the responsibility to increase the health literacy levels of patients |
| Malfatto et al., 2017  (Italy) 234 | Non-randomized control | Rehabilitation centre | 62  (N/A) | AMI | 90 min sessions, 5 days/week | - Physical exercises - Patient education | - PT - RN | - After a first uncomplicated AMI, abnormalities of left systolic and diastolic ventricular function may be present persisting over time despite a normal LVEF, which are fully reverted by CR |
| Manzoni et al., 2011 (Italy) 88 | Observational pre-post | Rehabilitation centre | 62.2  (52:124) | MI CABG Angioplasty | 1x-6x week for 1 month | - Physical exercises - Patient education - Psychosocial intervention | N/A | - CR led to decreased weight and BMI and improved psychological well-being - There is a positive correlation between weight loss and psychological health improvement independent of age, sex, BMI, diabetes, and ejection fraction of heart |
| Marcassa et al., 2016 (Italy) 235 | Prospective cohort | Inpatient rehabilitation hospital | 68  (N/A) | CABG surgery/valvular surgery | 2x/day for 6 days | - Patient education - Physical exercises | N/A | - By the end of CR, 73% of patients improved their functional category, indicating a reduction in disability severity - Over half of patients experienced at least one re-hospitalization admission following CR, with those who had a more severe disability at discharge displaying a higher number of total hospital admissions and the highest rate of urgent admissions - All-cause mortality in CABG and valvular surgeries were comparable, and those who were diabetic and had more comorbidities were more likely to experience all-cause mortality - Patients with no or mild disability at discharge at a 5-year survival rate comparable to that of the normative population |
| Masnaghetti et al., 2017 (Italy) 89 | Retrospective | Acute hospital | 67 (784:1706) | CAD | N/A | N/A | N/A | - Those with altered fasting glycaemia scores had longer hospital LOS, higher creatinine values, and showed a higher risk for atrial fibrillation - Age, BMI, and a history of hypertension were significantly associated with altered fasting glycaemia - Patients with altered fasting glycaemia had worse in-hospital outcomes, as shown by the longer LO, higher frequency of adverse events, and lower white blood cell counts |
| Mayer-Berger et al., 2014  (Germany) 90 | RCT | Tertiary hospital | 49  (66:534) | CAD | 30-60 min sessions, 3x/day for  3 weeks | - Patient education - Physical exercises - Psychosocial intervention | - Physician | - This long-term secondary prevention programme with inpatient rehabilitation at the beginning and telephone reminder for a 3-year period was successful. - Significant differences in health-related quality of life between the intervention and control groups, despite the relatively positive outcomes in the control group |
| Mendes et al., 2011 (Brazil) 91 | Non-randomized clinical trial | Inpatient rehabilitation hospital | 58 (11:33) | CABG | 1x/day for 5 days | - Physical exercises | - PT | - Post CABG patients demonstrated greater beneficial cardiac arrhythmia adaptation as shown by greater non-linear HRB parameters |
| Meng et al., 2014 (Germany) 92 | Multicentre quasi-experimental cohort | Inpatient rehabilitation hospital | 54 (29:405) | CHD | 5 sessions, 45 mins each session for 3 weeks | - Patient education - Psychosocial intervention - Physical exercises | - Physician - Psychologist - PT | - Individuals who received the didactic CR education program showed superior illness knowledge at the time of discharge from inpatient rehabilitation - At 1-year post-discharge, significant adherences in healthy diet were maintained, as well as a maintenance in physical activity - There were no changes in medication adherence following participation in CR - The program worked best for individuals immediately after an acute cardiac event, illustrating how individuals at different illnesses stages may benefit from difference modes of intervention |
| Miche et al., 2009  (Germany) 236 | Non-randomized follow-up | Rehabilitation centre | N/A | CHF | 2-3x/week | - Physical exercises - Patient education | - Physician - Psychologist - Dietary assistant - Sports specialist | - There were differences in the clinical parameters and the QOL between the older and the younger patients both after 4 weeks and at the follow-up. - Elderly patients can also benefit from physical exercise training, with improvement in clinical parameters and QOL. |
| Mlakar et al., 2013 (Slovenia) 186 | Observational pre-post | Inpatient rehabilitation hospital | 56.7 (0:21) | MI | 30 mins/day for 2 weeks | - Physical exercises - Patient education - Aquatic therapy - Nordic walking - Soft tissue manual therapy and other osteopathic manual therapies | - PT | - Smokers had more associated diseases linked to atherosclerosis, greater LDL levels at both the beginning and end of CR, and presented different markers of oxidative stress compared to non-smokers - There was a positive effect of CR on reducing oxidative stress, as demonstrated by a decrease of isoprostanes and higher levels of erythrocyte catalase in non-smokers, and this decrease was not observed in smokers - Smokers adapt much slower to enhanced stress caused by exercise in comparison to non-smokers |
| Mohammed and Shabana, 2018 (Egypt) 93 | Observational | Acute hospital | 55.6 (14:66) | CHF | 2 sessions/week for 8 weeks | - Physical exercise - Patient education | N/A | - By the end of CR, the following indicators had decreased: smoking incidence, BP, HR, waist circumference, BMI, hemoglobin levels - CR had no impact on patients’ LDL and blood lipids levels - 6MWD and scores of HRQoL had improved at the end of CR |
| Mohammed Mehani, 2012 (Egypt) 187 | Observational | Acute hospital | 50.6 (0:50) | CAD | 2x/day for 30 minutes for 2 weeks | - Physical exercises | N/A | - There was a significant improvement in mean 6MWD and mean VO2peak following CR, however it is unclear whether these indicators of functional capacity retained long-term improvements post-discharge - The mean value of HRR declined, indicating an improvement in heart rate recovery following CR |
| Motohiro et al., 2005 (Japan) 237 | Non-randomized control study | Acute hospital | 57  (N/A) | MI | 1 hr, 5x/week for 3 weeks | - Physical exercises | N/A | - Training resulted in significant increases in oxygen consumption, cardiac output, and stroke volume and a significant decrease in systemic vascular resistance at peak exercise (overall, P < 0.05). - Exercise training improved exercise tolerance by improving thermodynamic responses to exercise after myocardial infarction. |
| Motoki et al., 2019 (Japan) 94 | Observational | Inpatient rehabilitation hospital | 83 (30:26) | ADHF | 30 min sessions, 5 days/week for 2 weeks | - Physical exercises - Occupational training | N/A | - Patients who lower scores on functional ability to perform ADLs also had worsened ventricular structure and functioning - Lower scores of functional ability to perform ADLs was correlated with all-cause mortality - BI scores may be considered a useful measure to adopt as an indicator for success and goals of CR |
| Mourot et al., 2010 (France) 188 | Observational | Rehabilitation centre | 54  (0:24) | CHF CAD | 3-5x/week for 3 weeks | - Physical exercises - Aquatic therapy | N/A | - CR participation led to increased SV, CO, and PP, and decreased HR, diastolic BP, and SVR |
| Muller-Nordhorn, Roll and Willich, 2004  (Germany) 95 | Prospective cohort | Rehabilitation centres | 60-65  (534:1907) | MI | 3 weeks | N/A | N/A | - Using a shorter form measurement to assess HRQoL in those with MI and other cardiac conditions is feasible |
| Murphy et al., 2007 (Australia) 96 | Retrospective | Acute hospital | 64  (35:54) | CAD MI  Arrhythmia  Cardiac arrest | N/A | - Physical exercises - Patient education - Psychosocial interventions | N/A | - Strategies including retrospective audit and feedback along with staff awareness of barriers about implementation of ICR at acute care unit are not enough to improve concordance rate between the program and the practice guideline - Major barriers to implement ICR at acute care unit include lack of time, experienced staff, patient’s fatigue and anxiety, and delayed medical diagnosis |
| Musekamp et al., 2017  (USA) 97 | Prospective secondary analysis | Inpatient rehabilitation clinics | 62  (81:261) | HF | 60 mins for 3 weeks | - Physical exercises - Psychosocial intervention - Patient education | - Physician - RN - Psychologist - PT | - Changes in self-reported self-management skills were observed immediately after rehabilitation - aim of rehabilitation and self-management patient education to sustain self-management skills in everyday life was reached - Findings support the assumption that improvements in self-management skills may foster improvements in distal outcomes. |
| Nakamura et al., 2010 (Japan) 98 | Retrospective analysis | Acute hospital | 75  (66:71) | Valvular surgeries | N/A | - Physical exercises | N/A | - CR program reduced the incidence of postoperative delirium/confusion significantly and increased the rate of directly returning home significantly from 47% before starting the program to 95% after adopting the program. - Early mobilization recovery and early cardiac rehabilitation were highly useful for postoperative recovery among octogenarians. |
| Nguyen et al., 2013  (Canada) 99 | Retrospective registry | Acute and tertiary hospitals | 63.5 (1090:2248) | ACS | N/A | N/A | N/A | - CR referral rate after ACS in Ontario continues to be lower than recommended, although there has been a steady increase over time - Factors associated with lack of CR referral include: advanced age, non-ST-elevation ACS, lack of left ventricular function assessment, in-hospital HF, and vascularization |
| Nissinoff et al., 2011 (USA) 189 | Case series | Acute hospital | 62.6 (0:3) | HF | Up to 10 days | - Physical exercises - Occupational training | N/A | - LVADs may require anticoagulation, which can contribute to intracranial hemorrhage - Being tethered to a life-sustaining device such as an LVAD can evoke fear of death and cause changes in self-image - FIM scores and hospital LOS improved in all 3 patients - While survival following LVAD implantation is roughly 1-2 years, the present sample only survived 3-7 months |
| Ogawa et al., 2021  (Japan) 100 | Retrospective cohort | Rehabilitation centre | 67  (124:182) | Valvular surgery | Up to 90 mins/day, 2-7x/week | - Physical exercises - Patient education | - PT - Physician - RN - Nutritionist | - Multi-CR reduced the incidence of unplanned readmission - Early multidisciplinary CR can reduce hospitalizations and improve long-term prognosis after cardiac surgery |
| Opasich et al., 2004 (Italy) 101 | Pre-post | Acute hospital | 64.6 (202: 365) | IHD | 4 days | - Physical exercises | - PT | - The speed at which individuals could walk was correlated with gender, with women being able to walk at a faster speed than males following cardiac surgery - Individuals with poor 6MWT performance are more likely to spend longer in rehabilitation - 6MWT performance is significantly worse in those with comorbidities, which are apparent in hospitalized cardiac patients |
| Orme et al., 2020 (United Kingdom) 238 | Pre-post | Acute hospital | 63 (N/A) | Stroke | 2x/week for 6 weeks | - Physical exercises - Patient education | - PT | - Following ICR, stroke patients took significantly more steps compared to baseline and spent more time performing active movement - Despite physical movement and step count increasing following ICR, physical activity (as measured by step count) levels following rehabilitation still remained lower than the recommended amount |
| Pantoni et al., 2016 (Brazil) 102 | RCT | Acute hospital | 58 (12:15) | CAD | 2x/day for 5 days | - Physical exercises | - PT | - CPAP during ICR improves walking speed, breathing patterns, and overall ventilatory function immediately following cardiac surgery |
| Parsa et al., 2018 (Iran) 239 | Case control | Acute hospital | 57.71 (N/A) | CAD | 30 min sessions, 24 sessions across 8 weeks | - Physical exercises | - RN | - QoL improved following CR, with emotional QoL having the most improvement (reduction in anxiety and fears most notably) - Individuals who participated in CR were more likely to change their smoking status, cholesterol levels, and blood sugar levels |
| Pasquini et al., 2015 (Italy) 103 | Prospective interventional | Acute hospital | 71.1 (24:51) | HF | 2 1-hr sessions/day for 3 weeks | - Physical exercise - Pharmacological intervention - Patient education | - PT | - Following the 3 week ICR, VO2 levels, 6MWD, and respiratory functioning all statistically improved - The lower the steady-state respiratory exchange ratio before rehabilitation, the longer distance walked in 6MWT after rehabilitation - LVEF and distance walked prior to rehabilitation were independent positive predictors of distance walked after ICR |
| Patman et al., 2001 (Australia) 104 | RCT | Acute hospital | 63  (53:158) | N/A | N/A | - Physical exercises | - PT - RN | - Individuals who received physiotherapy exercises following cardiac surgery spent 0.4 days less in hospital, but 6 hours more in ICU - Smoking history did not influence whether physiotherapy following cardiac surgery influences pulmonary function and hospital LOS |
| Peschel et al., 2007 (Austria) 105 | RCT | Acute hospital and rehabilitation centre | 62.5 (9:29) | CAD | 6, 15 min sessions/day for 4 weeks | - Physical exercises - Patient education - Pharmacological intervention | - Physician - Exercise specialist | - After the 4 week CR, patients displayed a significant improvement of maximal work capacity, BMI, and BP - Cholesterol levels improved by the end of the 4 week CR to the point of being within the recommended range - Improvements in BMI, cholesterol, and maximal work capacity were observed up to 6 months post-discharge, however these improvements were not as high as after 4 weeks of ICR |
| Pizzorno et al., 2020  (Italy) 106 | Retrospective case-control | Acute hospital | 79.18  (87:73) | CABG  Valvular surgeries | 2x/day for 60 minutes | - Physical exercises - Psychosocial intervention - Patient education | - PT | - Beginning CR in the first week seems to be effective in improving physical performance after cardiac procedures in patients aged ≥ 75 years, reducing LOS and sanitary costs |
| Polcaro et al., 2008 (Italy) 107 | Interventional | Inpatient rehabilitation hospital | 70 (159:300) | CABG  Valvular surgeries | 3 weeks | - Pharmacological intervention - Physical exercises | - PT | - Walking distance and speed was better in patients with preserved ventricle functioning - The physical benefits of walking longer distances was more apparent in those with poor ventricle functioning - Anemia was associated with greater increases in distance waked |
| Proudfoot et al., 2007 (United Kingdom) 240 | Survey | Acute hospitals | N/A  (N/A) | ACS  MI | N/A | - Patient education - Physical exercises | - RN - Dietician - Pharmacist - PT | - RN is the only profession that is involved in every program across hospitals in UK, followed by dietitian (63%), pharmacist (59%), PT (49%), OT (10%), and psychologist (9%), and RNs are largely responsible for patient education - Majority of hospitals indicated lacking appropriate staffing levels, especially PT, dietitians, and psychologists - Other barriers include lack of time, funding, and resources - The service was not routinely monitored consistently across hospitals |
| Racca et al., 2015 (Italy) 108 | Observational | Acute hospital | 65.7 (16:34) | CABG  Valvular surgeries | 1 hour/day, 5 days/week | - Physical exercises - Patient education - Psychosocial intervention | - Physician - PT - Psychologists | - Using the ICF to quantify recovery in CR and can be used in clinical practice - Following CR, individuals had improvements in functionality according to body function, body structure, and body activity and participation |
| Racca et al., 2017 (Italy) 109 | RCT | Acute hospital | 65.9 (34:46) | CABG  Valvular surgeries | 5 days | - Pharmacological intervention - Soft tissue manual therapy and other osteopathic manual therapies | N/A | - LOS for hospitalization was significantly lower in those who received OMT than controls, whereby hospital LOS was reduced by 2 days - OMT treatments decreased the level of perceived pain and improved functional capacity in terms of inspiratory volumes - OMT did not impact improvements in 6MWD or in anxiety and depression scores |
| Rahmani et al., 2020  (Iran) 110 | RCT | CR clinic | 53.5 (22:6) | CSX  Angina | 60 min sessions, ≥ 12 sessions, 3 days/week for 1 month | - Physical exercises | - Physician | - An increase in peak oxygen uptake was signifi­cantly higher in the CR group than in the control group - Resting O2 pulse was increased in the CR group, which signifi­cantly differed between groups - Exercise test duration and the Duke Treadmill Score significantly increased in the CR group as compared with the UC group - Adding a 4-wk course of CR to UC for patients with CSX increased the Duke Treadmill Score, ex­ercise test duration and improved the resting O2 pulse, peak Vo2, and first-minute recovery heart rate |
| Ratajska et al., 2020 (Poland) 111 | RCT | Acute hospital | 64.13  (21:59) | IHD | 3-5x/day for 15-30 min | - Soft tissue manual therapy and other osteopathic manual therapies | - PT | - Myofascial release techniques in the conventional form of cardiosurgical rehabilitation might enhance the improvement in pulmonary function, lessen breathing difficulties, pain intensity and fatigue - Myofascial release augments the increase in physical endurance among patients during the early postoperative period after CABG |
| Reibis et al., 2014  (Germany) 241 | Prospective cohort | Various rehabilitation centres | 62.1  (N/A) | ACS | 1x/day for 3 weeks | - Physical exercises - Psychosocial intervention - Patient education | - Physician | - Patients with ST-segment elevation or non–ST segment elevation acute coronary syndromes both benefit from CR as their lipid profile, blood pressure, and physical fitness improved |
| Reibis et al., 2015 (Germany) 242 | Registry | CR hospitals | 63.6  (N/A) | CHF | 3 weeks | - Pharmacological treatment - Physical exercises | N/A | - Patients with lower ejection fractions had lower BP and lipid values, higher exercise capacities - Cardiac rehab programs across Germany are effective at decreasing cardiac event re-occurrence |
| Reibis et al., 2016 (Germany) 112 | Retrospective analysis | Rehabilitation centre | 51.7  (68:489) | ACS | N/A | - Patient education - Physical exercises | N/A | - CR patients were trained in line with current guidelines with moderate-to-high intensity and reached a considerable increase of their training volume. - Physical fitness level achieved at discharge from CR is dependent on age, but to a higher extent on various factors related to training (exercise capacity at entry, increase of training volume and training method) |
| Riley et al., 2019 (USA) 113 | Survey | Rehabilitation centre | 57 (24:57) | MI | N/A | - Patient education | N/A | - The most widely reported reason for not attending CR is due to a belief that individuals will be fine without CR, and that they can exercise in solidarity rather than in a group setting - Intention to attend/not attend CR was not predictive of actual CR attendance within the first 2 months following hospital discharge - Some patients did not report that CR was a support system to aid with smoking cessation, whereas others stating that attending CR is the reason they quit smoking |
| Rossi Ferrario et al., 2019 (Italy) 114 | Pre-post | Rehabilitation centre | 62  (109:10) | LVAD implantation | N/A | - Patient education - Physical exercise - Psychosocial intervention - Discharge planning | - LVAD device specialist - Physician - RN - Psychologist - PT - SW | - Participating in CR helped to decrease patients’ anxiety and depression symptoms, improve patients perceived general health status and device management skill, and decrease caregivers’ perceived strain at discharge and 6 months following discharge - The outcomes remained stable 6 months after discharge |
| Russo et al., 2012 (Italy) 243 | Pre-post | Acute hospital | N/A  (N/A) | CAD | 30 mins, 3x/day, 6 days/week for 2 weeks | - Physical exercises | - Physician - PT | - Over half of participants displayed abnormal blood glucose levels prior to CR participation - Patients with high blood glucose levels still displayed a significant increase in the distance walked within 6 minutes |
| Russo et al., 2014 (Italy) 244 | Observational non-randomized study | Acute hospital | 82.1  (N/A) | CAD | 10-30 min sessions, 6 days/week | - Physical exercises | - Physician - PT | - A short-term, supervised, exercise-based CR is feasible, safe and effective in octogenarian patients after TAVI as well as after traditional cardiac surgery - Early CR program enhances independence, mobility and functional capacity and should be encouraged in all patients. |
| Salzwedel et al., 2014 (Germany) 117 | Pre-post | Inpatient rehabilitation hospital | 70.9  (275:978) | CABG  Vascular surgeries | 21 days | - Physical exercises - Psychosocial intervention - Patient education | - Psychologist | - BP, LDL cholesterol levels, triglyceride levels, HR, scores on 6MWD, symptoms of HF and angina, pain, somatic health, depression and anxiety symptoms, and psychological well-being are all relevant parameters that can be used to evaluate ICR outcomes |
| Salzwedel et al., 2017 (Germany) 120 | Prospective observational | Inpatient rehabilitation hospital | 54.5 (100:396) | CAD | 21 days | - Physical exercises - Patient education - Psychosocial intervention | - Psychologist | - Upon discharge from CR, the rate of mild cognitive impairment reduced to 33% - Mild cognitive impairment was associated with a high prevalence of smoking, heavy workloads, sick leave longer than 1 month prior to CR, reduced exercise capacity, and a shorter 6MWD - There was no association between cognitive impairment and reduced LVEF |
| Salzwedel et al., 2019 (Germany) 115 | Prospective observational | Inpatient rehabilitation hospital | 55 (80:321) | ACS | 21 days | - Physical exercises - Patient education - Psychosocial intervention | - Physician - Psychologist - Dietitian - Sports therapist - PT | - Individuals with mild cognitive impairment participated in fewer educational sessions - Lifestyle behaviours were significantly improved over the onset of CR, with an increase in the proportion of individuals who had improved their diets, decreased their frequency of smoking, and increased their physical activity levels - Changes in disease-related knowledge are predicted by MoCA scores and type of surgical procedure, with CABG having a negative impact on the changes in medical knowledge during follow up - The sustainability of patient education was affected by patients’ prior knowledge of CR |
| Salzwedel et al., 2019 (Germany) 116 | RCT | Inpatient rehabilitation hospital | 51 (89:265) | ACS | 6, 60 min sessions across 3 weeks | - Physical exercises - Patient education - Psychosocial intervention - Occupational training | - Physician - SW | - Depression and anxiety scores were significantly lower following ICR, however the study intervention itself has no effect on the change in mental health and QoL - At 12 months post-CR, roughly 15% of participants were receiving occupational rehabilitation, sick benefits, and/or disability pension benefits - More participants in the intervention group shower persistent nicotine consumption at 12 months post-CR than in the control group - Work resumption 1 year after discharge from ICR was not influenced by the intervention - The present findings highlight that psychosocial factors may not be effective at achieving behavioural change, and participants themselves claim that behaviour change occurs through psychical aspects, especially when it comes to improving their health status |
| Salzwedel et al., 2019 (Germany) 119 | Single-centre retrospective | Inpatient rehabilitation hospital | 52.7 (208:676) | ACS | 12 sessions/week for 3 weeks | - Physical exercises - Patient education | - Physician - Psychologist - PT | - Patients with a negative occupational prognosis were more likely to be women, were more often on sick leave before the cardiac event, were more likely to experience mental health symptomology, and more likely to have poorer physical health as evidenced by multiple comorbidities - There were statistically significant differences regarding further treatment recommendations in patients with normal and negative occupational prognoses, with the latter being more likely to require psychological support - Not only does the presence of comorbidities influence the likelihood of participants returning to work, but it also impairs exercise capacity and influences the likelihood of participating in CR |
| Salzwedel et al., 2020 (Germany) 118 | Registry | Inpatient rehabilitation hospital | 54.2  (294:968) | CAD  MI  CABG | 3-4 weeks | - Patient education - Physical exercises - Psychosocial intervention | - Physician - SW - PT | - CR participation led to a reduced proportion of current smokers, reduction in BP, LDL cholesterol, increases in maximal exercise capacity, endurance training load, 6MWD, and increases in the number of patients with excellent to very-good self-perceived health prognosis - Majority of patients rated their occupational prognosis negatively, and only 68.5% of patients returned to work following CR |
| Sansone, et al., 2002 (USA) 121 | Retrospective | Acute hospital | 70  (57:86) | CABG | 2-3 hrs/day, 3-7x/week | - Physical exercises | - Dietitian - Exercise physiologist - OT - PT - SW - Therapeutic recreation therapist - RN - Physician | - Total FIM scores at discharge were significantly higher than those on admission - The higher-functioning group differed from the lower group with a shorter stay, greater FIM gains per week and greater likelihood of discharge to home or community - Admission FIM scores are important predictors for the clinical course and discharge outcomes of CR patients, with those with higher admission FIM scores having a shorter LOS and greater likelihood of discharge to home |
| Santos-Hiss et al., 2011 (Brazil) 122 | Interventional | Acute hospital | 53  (7:30) | AMI | 5 days | - Physical exercises | - PT | - 5 days of progressive exercise improves vagal modulation and balance - Cardiovascular and respiratory health during resting supine condition all improved following CR |
| Sarah et al., 2019 (Germany) 190 | RCT | Inpatient rehabilitation hospital | 53 (0:228) | HTN CAD | 45 min sessions, 5x/week for 3 weeks | - Physical exercises - Psychosocial intervention - Patient education | - Yoga instructors - Physicians | - At 6 and 12 months follow up, there was a significantly higher prevalence of yoga adherence in the intervention group - Yoga adherence was significantly associated with an increase in weekly training frequency and longer durations of training sessions, and this increase in frequency/duration occurred gradually between 6-12 months - The main reason for non-adherence was due to a lack of time and motivation, especially for those in the control group - Reduced BP and improved HRQoL was observed in the intervention group immediately following ICR and at 12 months follow up - While there was a significant difference in HR for the control and intervention groups, there were no significant changes in endothelial functioning immediately after and 6-12 months post intervention |
| Sasanuma et al., 2015  (Japan) 191 | Case report | Acute hospital | 39 (0:1) | FM | N/A | - Physical exercises - Occupational training | N/A | - Cardiac rehabilitation team provided support to him for his long-term overseas assignment in the fifth year after myocarditis onset - The rehabilitation program allowed him to return to satisfactory social life - Comprehensive intervention by a cardiac rehabilitation team from the acute phase may be helpful for motivating patients not only to participate in rehabilitation during hospitalization, but also to continue it on an outpatient basis after discharge |
| Sato et al., 2005  (Japan) 192 | Prospective cohort | Tertiary hospital | 46-75 (0:20) | CHD | 2x/day, 60 mins/day, 6 days/week for 2 weeks | - Physical exercises | N/A | - The results suggest that additional physical activity during a CR program may lead to an improved heart rate recovery in patients after CABG |
| Scalvini et al., 2013 (Italy) 123 | Quasi-experimental | Acute hospital & home | 63 (11:89) | CAD | 2 sessions/day for 140 mins/day for 4 weeks | - Patient education - Physical exercises | - RN - PT - Dietitian - Physician | - Home based rehabilitation is a feasible delivery method and yielded similar outcomes to those who received hospital-based CR (e.g. improved LVEF function, improved blood hemoglobin, length of rehab) - The number of days from surgery to rehab was significantly higher in those who received hospital-based CR |
| Scalvini et al., 2019 (Italy) 124 | Survey | Acute hospital | 75 (18842:20867) | HF | Up to 20 days | - Physical exercises - Patient education | N/A | - Individuals who are referred to CR tend to have more comorbidities and have a significantly higher number of surgical procedures, with surgery being one of the main reasons for CR referral - Male, gender, age, number of comorbidities and number of surgical procedures were significantly associated with mortality, whereas the presence of beta-blockers and attending outpatient rehab being associated with improved survival - Timing of admission to CR plays an important role in participation, as admission within 30 days helps to promote better clinical outcomes |
| Schmidt et al., 2018 (Germany) 125 | Retrospective | Inpatient rehabilitation hospital | 55.9 (59:9) | HF | 3-5 days/week for 25 days | - Physical exercises | N/A | - Most patients were able to improve their performance on 6MWD following CR, and some patients were able to discontinue their use of a rollator walker entirely following CR - There was a strong correlation between peak work load and peak oxygen consumption during bicycle ergometry - Despite improvements in 6MWD, only one participant achieved the target walking distance for their age |
| Schnöll et al., 2015  (Austria) 126 | Cohort | Cardiac rehabilitation centres | 66  (311:884) | CHD | 3-4 weeks | - Physical exercises - Patient education | - Physician | - A 3–4-week exercise-based ICR programme coupled with counselling on diet and exercise, information about risk factors, can significantly reduce coronary risk factors in a subset of highly motivated and adherent patients |
| Schwaab et al., 2011 (Germany) 127 | Multicentre cohort | Acute hospital | 64 (209:586) | CHD | 12 days | - Physical exercises - Patient education | N/A | - Patients admitted to inpatient rehab were typically older, had more advanced CHD, more pronounced risk factors, and more comorbidities than those discharged home - Those who received ICR were more likely to be prescribed beta-blockers and angiotensin-converting enzyme inhibitors, however there was no difference in the types of individuals prescribed statins and antiplatelet drugs - CR led to significantly lower levels of LDL and triglycerides with the latter being influenced directly by nutrition habits - CR significantly decreased the proportion of smokers |
| Schwaab et al., 2019  (Germany) 245 | Multicentre, prospective non-interventional | CR centres | 62  (N/A) | MI | 22 days | - Physical exercises - Patient education - Psychosocial intervention - Pharmacological intervention | - Physicians | - During CR, the modifiable cardiovascular risk factors, in particular patients’ LDL levels, were substantially improved in patients after MI - Majority were able to return to work following CR - <50% of participants reached the LDL-cholesterol guideline targets during short-term CR |
| Schweikert et al., 2009 (Germany) 128 | Observational case-control | Acute hospital | 56.7 (24:88) | MI | 6hr/day | - Physical exercises - Psychosocial Intervention - Patient education | N/A | - QoL improved considerably from baseline, and this improvement sustained even after the CR - The average treatment time differs for both in- and out-patients, with inpatients receiving 2.1 days less of treatment - Inpatients on average had 14.2 physician visits and were hospitalized for 5.2 days, which contributes to the higher cost for ICR than for outpatients - Regarding both direct and indirect costs, inpatient cardiac rehabilitation was 2,846 EUR more expensive than outpatient rehabilitation |
| Scrutinio et al., 2012 (Italy) 129 | Observational | Inpatient rehabilitation hospital | 67 (51:224) | HF | 2-3x/day for 15-30 mins per session, 5x/week | - Pharmacological intervention - Physical exercises - Patient education | - Physicians - RN - PT | - During CR, kidney functioning improved for nearly all participants; in instances where renal functioning worsened, the worsening subsided after adjustment of therapy or rehydration - Functional autonomy was achieved in more than 70% of patients following CR - 6MWD scores improved for all patients, with the most notable improvements being noted in those who had baseline scored <300m |
| Seo et al., 2017 (Korea) 209 | Survey | Acute hospitals | N/A  (N/A) | IHD | 5-14 days | - Physical exercises - Patient education - Discharge planning | - RN - PT - Exercise physiologist | - All 10 hospitals practiced education on deep breathing and cough techniques - All 10 hospitals implemented early mobilization exercises, however only 4 of them implemented stair training - Depending on the type of clinician and location of ICR, CR participation may be low |
| Seo et al., 2019 (Korea) 130 | Pre-post | Acute hospital | 67.4 (5:10) | HF | 64 sessions | - Physical exercises | N/A | - The most commonly reported adverse event following hospital discharge was GI-related - Following LVAD implantation, there was a 89% survival rate at 12 months post-surgery - Following discharge from ICR, participation rates for outpatient CR were very low |
| Sharp and Salyer 2012  (USA) 131 | Descriptive, longitudinal | Inpatient rehabilitation hospital | 66  (24:27) | CHD | 15-60 mins/day | - Physical exercise - Patient education | - RN - Exercise physiologist | - CR participants reported higher self-efficacy for healthy dietary intake than did nonparticipants |
| Skobel et al., 2017 (Germany) 132 | Retrospective | Inpatient rehabilitation hospital | 67.9 (3:32) | CHF | 5x/week for 3 weeks | - Physical exercise - Psychosocial intervention - Patient education | N/A | - 6MWD & VO2 max improved significantly from baseline to end of CR - Exercise-induced dyspnea was reduced after 3 weeks of CR |
| Śmiałek et al., 2013  (Poland) 133 | Pre-post | Inpatient rehabilitation hospital | 62.2  (17:28) | ICD implantation | 2 weeks | - Physical exercises - Patient education | N/A | - CR led to improvements in exercise capacity, QoL in physical dimension, severity of depression, and hemodynamic parameters (LVEF, LVESD) |
| Socha et al., 2017 (Poland) 134 | Pre-post | Inpatient rehabilitation hospital | 62.5 (21:44) | CHD | 3 weeks | - Physical exercises - Soft tissue manual therapy and other osteopathic manual therapies - Light therapy | N/A | - There was a reduction in body mass and BMI in both men and women following CR - Body fat was significantly lower in males following CR in comparison to females - Adnominal obesity indicators are positive associated with CHD, and abdominal obesity was present statistically significantly more frequently in women - The greatest change in body composition was observed in those <65 years - Women present with more serious symptoms of anxiety/depression, resulting in reduction of CR participation |
| Soleimannejad et al., 2014  (Iran) 135 | RCT | Rehabilitation clinic | 57  (46:100) | CAD | 15-45 min sessions, 24 sessions, 2-3x/week | - Physical exercises | N/A | - CR exercise program can be effective in the augmentation of LV diastolic dysfunction after PCI, without significant changes in LV diameters |
| Song, 2003 (Korea) 136 | Non-equivalent control  group non-synchronized | Acute hospital | 62  (22:33) | IHD | 2 50 min sessions | - Patient education | - RN | - A cardiac rehabilitation program focusing on promoting self-efficacy was effective in improving self-efficacy, and quality of life of patients with ischemic heart disease |
| Spencer et al., 2001  (USA) 246 | Longitudinal | Acute hospital | 67.3  (N/A) | AMI | N/A | - Patient education - Discharge planning | - Physician - RN | - Patients participating in ICR were more likely to have documented inpatient counseling about nutrition, exercise, smoking, and stress reduction - Patients not referred to inpatient rehabilitation were less likely to be prescribed effective cardiac medications and undergo risk factor modification counseling prior to discharge |
| Spiroski et al., 2017 (Serbia) 137 | Pre-post | Inpatient rehabilitation hospital | 57.7 (50:54) | MI | 45 min sessions, 2x/day, 7x/week for 3 weeks | - Physical exercise - Patient education | N/A | - After 3 weeks of CR, exercise tolerance improved significantly, as indicated by improved VO2peak/max levels - Baseline VO2 was significantly lower in those who received a heart transplant in comparison to those who received CABG surgery - VO2peak improved by 9% following the 3 week CR program, and improved an additional 24% at 6 months discharge, illustrating both immediate and short term benefits of ICR |
| Steinacker et al., 2011 (Germany) 138 | Comprehensive cohort | CR centre | 56.7 (25:87) | CHD | 6hrs/day for 4 weeks | - Physical exercises - Patient education | N/A | - At 12 months post-discharge, participants displayed an increase in BMI and an increase in the amount of time per week individuals spent doing physical activity - The present findings do not illustrate a that higher activity in CR actually translates to long term improvements, especially for outpatients - Individuals who received outpatient rehabilitation spent more time of the day in an active state in comparison to inpatients |
| Tabet et al., 2013 (France) 139 | Observational | Inpatient rehabilitation hospital | 55 (60:225) | CHF | 30 min sessions, 4-5x/week for 4 weeks | - Physical exercises | N/A | - VO2 peak, maximum workload, and VO2max were all predictors of cardiac management and outcomes - Independent prognostic value of peak VO2 changes after exercise training program completion |
| Taya et al., 2018 (Japan) 140 | Interventional | Acute hospital | 40.8 (8:16) | HF | 3-4x/week for 5-20 mins | - Physical exercises | N/A | - BNP levels decreased from the start of exercise to the end of HIIT - Knee extensor strength significantly increased during HIIT, and this improvement was most significant in those with more moderate heart failure - Muscle strength improved for all participants, but this improvement was only observed in lower extremities |
| Teffaha et al., 2011 (France) 193 | RCT | Inpatient rehabilitation hospital | 50-53  (0:48) | CHF  CAD | 5x/week for 3 weeks | - Physical exercises - Aquatic therapy | - PT | - ICR participation led to increased SV, R-R interval, VO2 max and decreased HR and diastolic BP |
| Tsai et al., 2017 (Taiwan) 141 | Observational | Acute hospital | 58 (3:57) | AMI | 10-15 min sessions, 2x/day | - Physical exercises | - Physician - PT | - OUES is an appropriate tool to evaluate cardiac functioning during exercise training, as peak oxygen uptake is not always obtainable in these populations - Early mobilization after AMI contributes to better exercise capacity as indicated by OUES |
| Turk-Adawi et al., 2014 (USA) 142 | Survey | Inpatient rehabilitation hospital | 61 (2130:4744) | CABG AMI  HF | N/A | - Discharge planning | - Physician | - Patients with CABG and had private health insurance were more likely to enroll in CR than those without insurance and other cardiac conditions - The following organizational factors were positively associated with CR enrollment: a greater frequency of CR promotion to patients, being affiliated with The American Association of Cardiovascular and Pulmonary Rehabilitation, and a rural CR facility location - The overall CR enrollment rate was 67.6%, which may be due to automatic/electronic referral strategies - Referral strategies are most effective when they before patient discharge - Rural CR programs may be associated with more CR participation due to the close relationship between HCPs and patients in a small community |
| Twardella et al., 2004  (Germany) 253 | Prospective cohort | Rehabilitation clinics | 59  (N/A) | CHD | 3 weeks | - Patient education | - Physician | - Major beneficial effects of smoking cessation are expected even within the first year after acute manifestation of coronary heart disease - Results underline the importance of efforts to support smoking cessation and to prevent relapse during and after rehab of patients with coronary heart disease |
| Twardella et al., 2006 (Brazil) 143 | Prospective cohort study | ICR hospital | 59 (134:746) | CHD | 3 weeks | - Physical exercises - Occupational training - Patient education | N/A | - During CR, the median intake of low fat foods increased, however following discharge, the intake of recommended food items dropped to levels close to those before CR participation - While most patients exhibited poor eating behaviour at baseline, the majority remained in the fair and good categories of nutritional status at 3 year follow up - To ensure long term adherence to healthy nutrition, there needs to be a stronger emphasizes on individualized interventions that address real life obstacles such as family eating habits, local availability of food, and time limitations |
| Ugata et al., 2018  (Japan) 194 | Case report | Medical centre | 61 (0:1) | DCMP | 5x/week for 8 weeks | - Physical exercises | N/A | - HIIT may be useful and safe even for severely deconditioned LVAD patients in order to improve peak oxygen consumption effectively |
| Ul-Haq et al., 2019 (Pakistan) 144 | RCT | Acute hospital | 53.6 (18:81) | MI | 1-2 weeks | - Pharmacological intervention - Patient education | - Physician - PT - RN - Dietitian | - Health related QoL is significantly improved with 4+ week follow up opportunities - Individuals who receive CR are less likely to perceive their health as ‘poor’ and are less likely to display psychological distress as it related to their health |
| Vasheghani-Farahani et al., 2018 (Iran) 247 | Pre-post | Acute hospital | 60.5  (N/A) | CABG | 3x/week, 24 sessions across 8 weeks | - Physical exercises | - PT | - Aerobic exercise decreases indices of ventricular repolarization (e.g. heart rate, QT dispersion, EF rates) |
| Vasic et al., 2019 (Slovenia) 248 | RCT | Inpatient rehabilitation hospital | 60  (N/A) | CAD | 2x/day for 6 days across 2 weeks | - Physical exercises - Patient education - Aquatic therapy | N/A | - Regardless of exercise on land or in water, CR improved aerobic exercise capacity as determined by improved VO2peak capacity and endothelial function - End of study VO2peak was higher in those who performed CR in water compared to those on land - Both land and water based exercise improved vascular function |
| Vincent & Vincent, 2008 (USA) 144 | Retrospective exploratory | Inpatient rehabilitation hospital | 72.4  (56:100) | CABG  MI  Valvular Diseases | 2x/day for 2 weeks | - Physical exercises - Patient education - Occupational training - Aquatic therapy - Wound care - SLP therapies | - RN - OT - PT - OTA/PTA - SLP | - Compared to skilled nursing facility, patients in inpatient rehab demonstrated shorter LOS, more likely to be discharged home, lower mortality, and more likely to achieve modified or complete independence in ADL - Inpatient rehab had higher therapy cost but lower hospital readmission than skilled nursing facility |
| Vitale et al., 2018  (Italy) 218 | Observational retrospective cohort | Acute hospital | 68  (N/A) | CAD | 4hrs/day | - Physical exercises | - PT | - 6MWT proved to be an independent prognostic tool, potentially allowing identification of high-risk patients for whom a more intensive and tailored ICR program should be designed and implemented in order to avoid unfavorable cardiovascular events |
| Voller et al., 2014  (Germany) 249 | Prospective non-interventional | CR centres | 63.4  (N/A) | CKD | 3-4 weeks | - Pharmacological intervention | - Physician | - Within a short period of time, CR led to substantial improvements in key risk factors such as lipid profile, blood pressure, and physical fitness for all patients |
| Weberg et al., 2013  (Norway) 146 | Survey | Inpatient rehabilitation hospital | 60  (19:70) | CABG | 2x/day for 4 weeks | - Physical exercises - Patient education | - RN - PT - SW - OT - Biomedical laboratory scientist - Physician - Chef - Dietician | - CR led to improvements in QoL outcomes from admission to discharge and a decrease in number of participants on sick leave from baseline to follow-up |
| Weeks et al., 2018 (USA) 147 | Observational | Inpatient rehabilitation hospital | 61  (7:8) | CAD | 20+ mins/day for 14 days | - Physical exercises - Occupational training | N/A | - The majority of participants met the minimum cumulative requirement of aerobic intensity, duration, and frequency necessary for cardiorespiratory benefit - There was a considerable range of the average: longest bout of continuous exercise, ranging from 0-65 minutes, and it was especially high for those on beta-blocker medications |
| Westerdahl & Moller, 2010 (Sweden) 199 | Cross-sectional descriptive survey | Acute care hospitals | 41  (N/A) | CABG  Valvular surgeries | 1-3 sessions/day for up to 4 days | - Physical exercises - Patient education | - PT | - PTs identified the main reason for CR following cardiac surgery was to prevent and treat postoperative complications, improve cardiopulmonary function, and encourage physical activity - Physiotherapy was seldom offered on Sundays for patients - Not all PTs were aware of the benefits of particular exercises on specific days post-op (e.g. only 6 PTs implemented ROM exercises due to lack of knowledge) - 1/3 of PTs considered the current CR physio to be sub-optimal due to a lack of time |
| Wichrowski et al., 2005 (USA) 250 | Non-randomized controlled trial | Inpatient rehabilitation hospital | N/A  (42:65) | MI  CHF | 60 mins | - Patient education - Horticulture therapy | N/A | - Patients reported a decreased heart rate and mood disturbance after horticultural therapy |
| Wieser et al., 2017  (Switzerland) 212 | Non-interventional registry | Acute hospitals | N/A | ACS | N/A | N/A | N/A | - The total cost of ICR amounted to 30 million Swiss Francs for society and 462 million Swiss Francs for health insurances - Inpatient stays cost more than outpatient care due to the more frequent staffing visits, costs of beds, and potential ambulance transport |
| Willich et al., 2001 (Germany) 148 | Multicentre prospective cohort | Inpatient rehabilitation hospital | 62.5 (537:1904) | MI | 3-4 weeks | - Pharmacological intervention | - Physicians | - Several of the major cardiac risk factors (high BP, LDL, BMI) improved markedly while participating in ICR, but worsened within the first 3 months following discharge, almost back to baseline - 43% of patients experienced one or more recurrent clinical events during 12 month follow up, illustrating insufficient long term control - The inability to manage risk factors was attributed to a lack of coordination between the hospital and the practitioners, as well as perceived lack of importance/severity from the patient |
| Windmoller et al., 2020 (Brazil) 154 | RCT | Acute hospital | 60  (9:22) | CABG | 2x/day, 30 mins each session for 4 days | - Physical exercises | - PT - Physician | - A standardized protocol (which includes gradual progressive training), coupled with cycle ergometer, results in shorter ICU LOS and maintenance of functional capacity - Muscle strength did not improve for those who participated in CR, potentially due to the types of exercises performed in CR |
| Wita et al., 2020 (Poland) 153 | Observational registry | Acute hospital & outpatient rehabilitation centres | 68.5  (4018:6826) | MI | 35 days max | - Physical exercises - Patient education | - Cardiology consultant | - At 12 months post-discharge, all-cause mortality rates were nearly two times higher for controls than in the experimental group – both inpatient and outpatient CR significantly reduced all-cause mortality - Access to CIEDs through referrals, as well as strict follow ups, significantly improved adherence to CR |
| Wurst et al., 2019  (Germany) 152 | RCT | Inpatient rehabilitation hospital | 58.5  (48:154) | CAD | 10-90 min sessions, 3x | - Physical exercises - Patient education - Nordic walking | - Licensed sports therapists - PT | - MoVo-LISA greatly increases the level of physical activity amongst previously inactive CAD participants for at least one year following treatment |
| Xu et al., 2015 (China) 251 | Interventional | Acute hospital | 49.7  (N/A) | ACS | 2-3 weeks | - Physical exercises - Psychosocial intervention - Patient education | N/A | - Obesity, as indicated by a high WC, was significantly associated with lower HDL following CR, however this association was not statistically significant when obesity was indicated with BMI - WC had a linear correlation with indices that reflected cardiac structure alteration while BMI did not - Regardless of whether obesity is characterised by WC or BMI, overweight/obesity is a worse parameter of prognosis |
| Yamamoto et al., 2012 (Japan) 151 | Observational | Acute hospital | 64.05  (86:312) | AMI | 2 weeks | - Physical exercises | N/A | - Walking speed in those with AMI were significantly lower than those without cardiac conditions, suggesting that speed decreases occur after AMI onset - Decreases in walking speed may not improve following CR participation - Leg strength was associated with walking speed in all age groups, however both leg strength and balance were associated with walking speed for older AMI patients |
| Yamamoto et al., 2014 (Japan) 150 | Retrospective cohort | Inpatient rehabilitation hospital | 73 (25:67) | IHD | 1 hour 5x/week | - Physical exercises | - Dietitians - Pharmacists - RN - PT - Physician | - Standing balancing training was significantly associated with higher event free survival and improved postural stability for IHD patients - Overall, ICR with standing balance training improved walking speed more effectively than programs solely based on resistance and aerobic training - Reduction in cardiac events post-discharge was associated with improvements in walking speed |
| Yildiz et al., 2018 (Turkey) 149 | Survey | Acute hospital | 63  (76:123) | HF | 50 mins | - Patient education | N/A | - Misinformation regarding CIEDs may result in self-imposed restrictions that negatively impact occupation and activities, and create hesitancy about electrical items found in the house - Patient education significant increased patients’ awareness regarding daily activities, with many reporting feeling more comfortable with driving, returning to sexual life, and sports - Those who did not participate in the educational intervention still reported enhanced knowledge, illustrating the value of experiential knowledge |
| Yokota et al., 2020 (Japan) 155 | Intervention | Acute hospital | 83  (176:143) | HF | 1x every 2 weeks | - Patient education - Physical exercises | - PT - Physician - RN - Pharmacists - Dieticians - SW | - Early CR and mobilization in the acute phase hospitalized HF patients contribute to improving ADL and home discharge rate. - Therefore, possibility that CR goal setting of BI ≥80 points is effective to home discharge in acute phase hospitalized HF patients |
| Yoshida et al., 2001  (Japan) 163 | Experimental | Acute hospital | 25-70  (4:47) | AMI | 20-40 mins, 2x/day, 7 days/week | - Physical exercises - Patient education | - PT - Physicians - RN - Nutritionists | - Results show physical and psychological improvements after the hospitalized 2-week CR program and these improvements were maintained at the 12-month follow-up - CR program improved the management of cardiac risk factors and psychological status in patients with MI |
| Yost et al., 2017 (USA) 162 | Pre-post | Acute hospital | 63 (15:75) | LVAD implantation | 3 hours | - Physical exercises - Patient education | - Physician - RN | - FIM scores significantly improve following ICR, illustrating an increase in functional capacity - Following ICR, most patients are discharged home with minimal complications |
| Yu et al., 2004  (China) 161 | RCT | Acute hospital | 63.8  (49:151) | CHD  AMI  PCI | 1-2 hrs, 7-14 days, up to 6 months | - Physical exercises - Pharmacological intervention - Patient education | - PT - OT | - Significant improvement of individual LV diastolic parameters towards less severe delayed relaxation was also observed in those who participated in ICR, especially in those with recent AMI - gain in exercise capacity was faster and more substantial in the ICR program than the control group and was significantly correlated with LV diastolic indices in those with ARP - In patients with CHD, ICR prevented the progression of resting LV diastolic dysfunction, without affecting systolic function. |
| Yu et al., 2020 (China) 160 | RCT | Acute hospital | 56 (33:52) | HF | 3-5x/week for 30-50 mins each session across 12 weeks | - Physical exercises | N/A | - Following CR, QoL scores were significantly higher in the experimental group than in the control group - VO2 peak and 6MWD scores were both elevated throughout the CR program - Re-hospitalization rates were much lower for the experimental group, but there were no significant differences in the types of arrhythmias that led to re-hospitalization |
| Zanini et al., 2019 (Brazil) 159 | RCT | Acute hospital | 28  (11:29) | CABG | 2x/day for 6+ days | - Physical exercises | - PT | - Protocols with active upper and lower limbs exercise training and progressive early ambulation had the best improvement in 6MWD and reduced LOS |
| Zhou et al., 2020 (China) 158 | Retrospective | Acute hospital | 50-78  (27:66) | CHD | 3-5x/week for 6 months for <40 mins | - Patient education - Psychosocial intervention - Peer support groups | - Nutritionists - Psychologist - RN - Physician | - 6 months after the intervention, the experiment group displayed longer term gains regarding the enhancement of comprehensive CR management, especially regarding QoL indicators - The experimental group reported higher degrees of disease cognition, treatment satisfaction, and were less likely to restrict their physical movements |
| Zoch-Lesniak et al., 2020 (Germany) 157 | Prospective observational multicentre registry | Acute hospital | 53.8 (363:1223) | ACS | 3 weeks | - Physical exercises - Patient education | - Physicians - Psychologists - PT - SW | - 77% of CR attendees reported that they were motivated to change their lifestyle as a consequence of the disease, and this motivation carried over into actual behaviour change with a reduction in the proportion of smokers, improved 6MWD, improved mental health outcomes, and improved blood lipid levels - With smoking cessation services typically only being offered while the individual is hospitalized, it is extremely important to have long-term follow up that maintains the benefits of CR |
| Zolfaghari et al., 2018 (Iran) 156 | RCT | Acute hospital | 62 (17:33) | CABG | 15 min sessions, 4x/day across 4 days | - Physical exercises - Soft tissue manual therapy and other osteopathic manual therapies | - PT | - Individuals who received massages as part of their CR experienced less pain in the 2-5 days post-surgery - Overall satisfaction with CR was higher in patients who also received therapeutic massages - Shorter durations of bed rest were correlated with reduces hospital costs and reduced complications post-surgery |
| Alavi et al., 2013 (Iran) 164 | Descriptive | Medical centres | 43-65  (4:9) | AMI  ACS | N/A | - Patient education | N/A | - Major barriers to cardiac rehabilitation utilisation related to human resource deficits (i.e., trained nursing) service related barriers, lack of available educational services, unfavourable attitudes of staff and patients and collaboration gaps which prevented timely access to cardiac rehabilitation services. - Two main challenges exist to the provision of effective patient education; inadequate human resources in the hospital wards, specifically in terms of trained health care professionals and service users’ specific health related views and behaviour |
| Back, Oberg and Krevers, 2017 (Sweden) 165 | Qualitative | Acute hospital | 64.5  (5:11) | CAD | 20 mins, 2-3x/week for 3-6 months | - Physical exercises - Patient education - Discharge planning | - PT | - There are connections between the past, the present and the future, in terms of attitudes to facilitators, barriers and the use of strategies for managing exercise - Interaction and meetings with the PT in the acute phase were described as important factors for attending exercise-based CR - Informants feel that PT supported them in learning the right level of effort during exercise and reducing fear of exercise - patients with CAD get existential thoughts both related to exercise during the rehabilitation process and for future attitudes to exercise - To be able to tailor exercise-based CR for patients, PTs need to be aware of patients' past experiences of exercise and previous phases of the rehabilitation process |
| Maddocks and Cobbing, 2017  (South Africa) 166 | Descriptive qualitative | Acute hospital | 56  (2:9) | CAD  MI | 2x/week | - Physical exercises - Patient education | - PT | - Three main themes that emerged were communication challenges between health care professionals and patients, the patients’ experience of physiotherapy, and their recommendations for service delivery - Results indicated that improvements need to be made in the areas of patient-centred care, equality of access to programmes, and appropriateness of programme content - Findings demonstrated that patients have a limited awareness of and participation in in-patient and outpatient CR programmes |
| Simonÿ et al., 2015 (Denmark) 167 | Phenomenological-Hermeneutic | Inpatient rehabilitation hospital | 66 (2:9) | CHD | 1-2 sessions for 2-6 hours across 8 weeks | - Physical exercises - Patient education | N/A | - Despite recognizing CR as beneficial, patients initially felt anxious and afraid about participating in CR due to a fear that that their hearts were not capable of enduring the level of physical stress – over time patients felt more confident in their exercise abilities and consequently their heart’s capacity - Patients felt safer, inspired, and motivated by observing and being with other individuals with similar experiences - Men specifically noted an improvement in mental well-being throughout the CR program, which motivated them even more to continue their active lifestyles |
| Svavarsdóttir et al., 2016 (Norway) 168 | Qualitative | Acute hospital | 42 (2:12) | CAD | NA | - Patient education | - RN - Physician - PT | - HCPs believe that theoretical and clinical knowledge are essential for patient education of cardiac conditions - The role of a HCP educator is to inspire, inform, support, and facilitate patients efforts to identify and achieve their own goals |
| White et al., 2011 (United Kingdom) 169 | Qualitative | Acute hospital | 42-65 (4:11) | CHD | 1 session/week for 45 mins across 6 weeks | - Physical exercises - Patient education | - Dietitian | - The most evident impacts following a heart attack were a desire to get back to normal and fear of having another, potentially fatal, cardiac event - Despite a high amount of individuals discussing their desire to cut out certain foods immediately following CR, at 1 month follow up, many individuals placed less value on maintaining dietary changes because they viewed their diet as being less likely cause of their cardiac event than they had previously thoughts - Although rare, those who did not make dietary changes were also those who did not understand the magnitude of their condition or a belief that diet was a cause of cardiac conditions - Patients did not talk about increasing their intake of healthy food options and merely discussed cutting unhealthy foods out |
| Murphy et al., 2021 (Australia) 198 | Pre-post | Tertiary hospital | 64.4  (27:0) | AMI  PCI  CABG | 6 months | - Physical exercises - Patient education | - Female yoga teacher - Nurse | - Women’s comments highlight the fact that women-only settings can be appealing due to a sense of comfort, ease and camaraderie - CR completion can be improved by offering a women-only yoga-based component |
